# Supplementary material for: MYC Is a Major Determinant of Mitotic Cell Fate
Source: PubMed Central journal article supplement — Cancer Cell. 2015 Jul 13;28(1):129–40. doi: 10.1016/j.ccell.2015.06.001 (PMC4518499; doi:10.1016/j.ccell.2015.06.001), 2015-07-13
Supplement: mmc1.pdf [file mmc1.pdf]

**Cancer Cell, Volume 28**

## **Supplemental Information**

### **MYC Is a Major Determinant of Mitotic Cell Fate**

**Caroline Topham, Anthony Tighe, Peter Ly, Ailsa Bennett, Olivia Sloss, Louisa Nelson, Rachel A. Ridgway, David Huels, Samantha Littler, Claudia Schandl, Ying Sun, Beatrice Bechi, David J. Procter, Owen J. Sansom, Don W. Cleveland, and Stephen S. Taylor**

# Supplemental Data

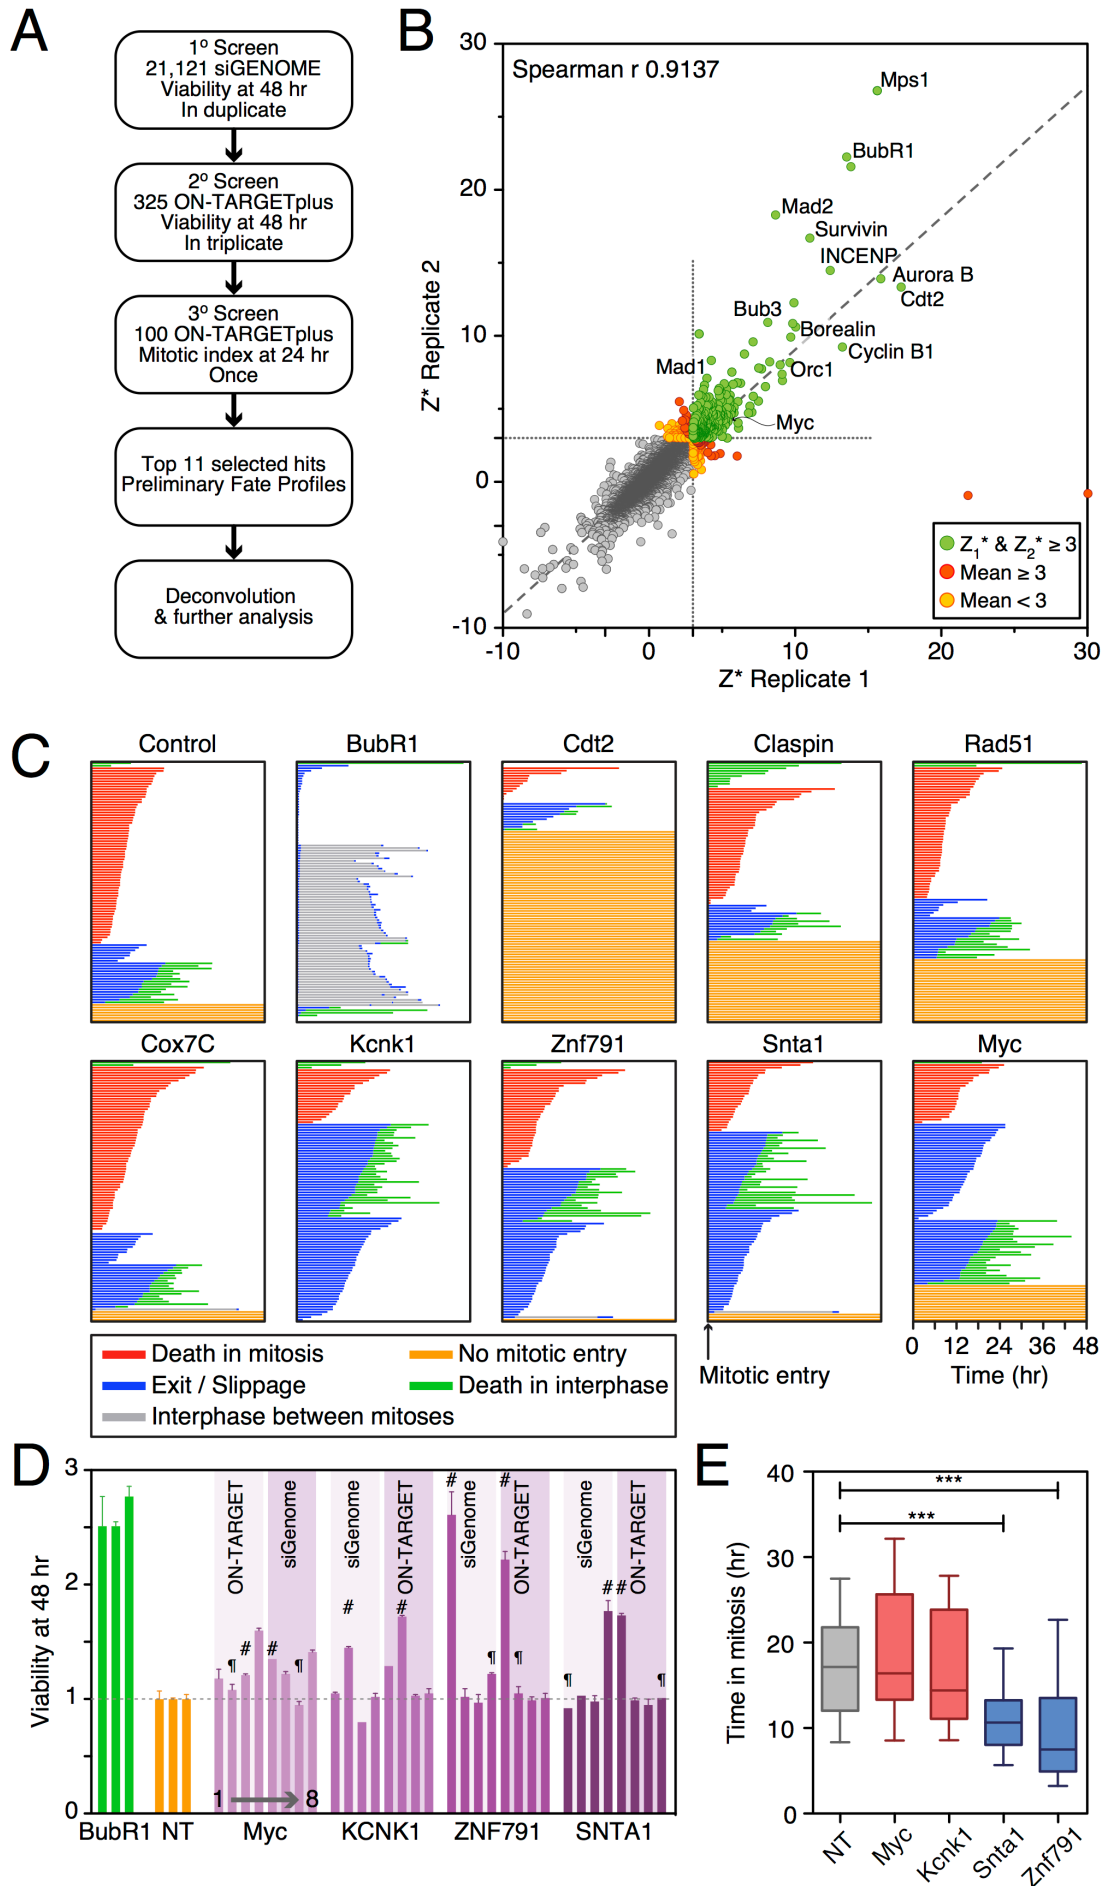

**Figure S1, related to Figure 1. A genome-wide siRNA screen for regulators of mitotic cell fate. (A)** Workflow of the screen. **(B)** Result of the primary screen, plotting the robust Z scores ( $Z^*$ ) for the two replicates.  $Z^*$  scores were calculated using the median absolute deviation for each plate (Chung et al., 2008). Genes with mean  $Z^*$  scores greater than 3 were taken forward to the secondary screen. **(C)** Fate profiles of RKO cells transfected with selected ON-TARGETplus SMARTpools and exposed to 0.1  $\mu$ M taxol. **(D)** Bar graph showing viability of taxol-treated RKO cells after transfection of individual siRNAs from the SMARTpools used in the 1<sup>o</sup> and 2<sup>o</sup> screens. While siRNAs in many of the siGENOME and ON-TARGETplus SMARTpools are distinct, in some instances there is duplication, indicated by hashtags (#) and paragraph symbols (§). Myc siRNAs 4, 5, 6 and 8 repress Myc and inhibit death in mitosis (DiM) (Fig. S2A) so they were pooled and used for further experiments, while #4 was used in isolation for the RNAi-rescue experiment in Fig. S2B. Values represent mean and SD from two experiments. **(E)** Box-and-whisker plots (median, interquartile and 10-90% ranges) showing that in isolation, *SNTA1* #4 and *ZNF791* #1 accelerate mitotic exit. In contrast, the active *KCNKI* siRNA more closely resembles the Myc phenotype.

**Table S1, related to Figure 1.** Primary screen; MTS values at 48 hr. Used to generate Fig. S1B. (Provided as an Excel file).

**Table S2, related to Figure 1.** Secondary and tertiary screens; MTS values at 48 hr and mitotic index (granularity) values at 24 hr. Used to generate Fig. 1C. (Provided as an Excel file).

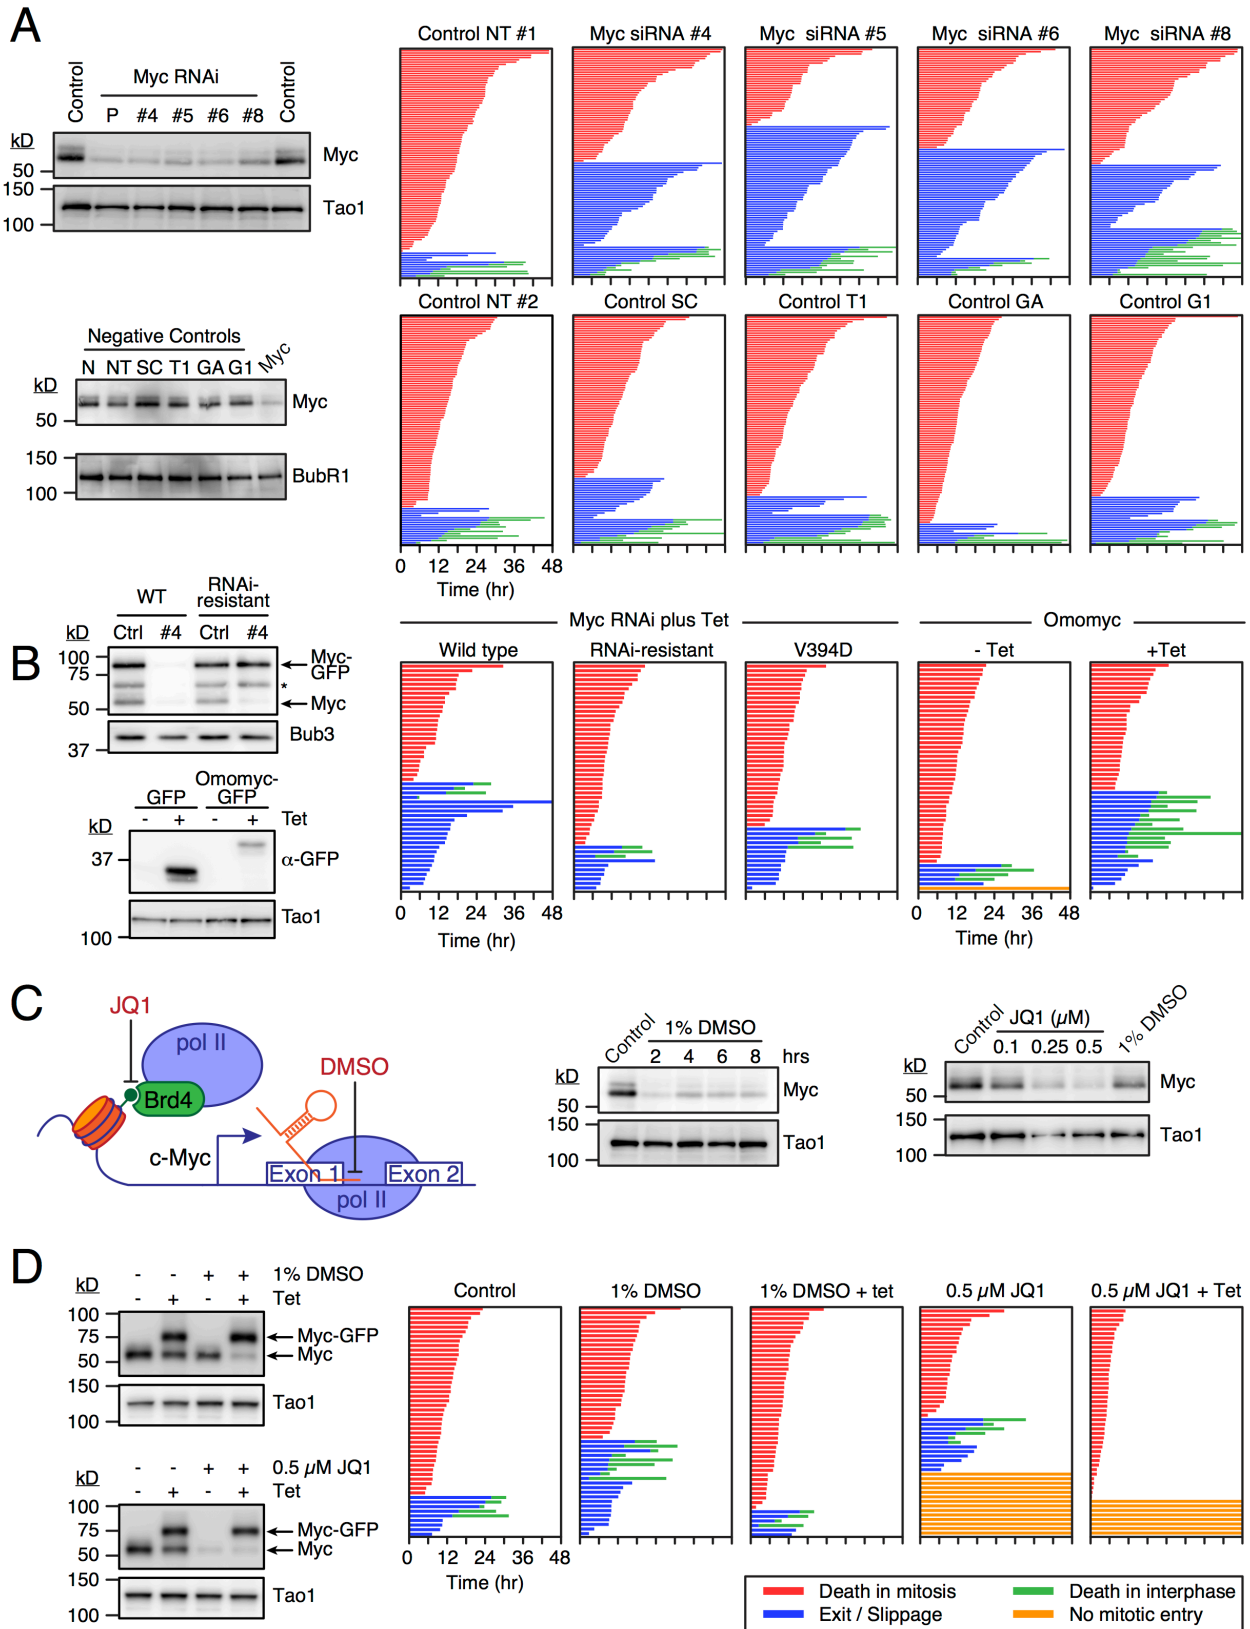

**Figure S2, related to Figure 2. Myc is a regulator of mitotic cell fate.** (A) Deconvolution of siRNA pools targeting Myc. Immunoblots of RKO cells transfected with four active Myc siRNAs, either as a pool (P) or individually (nos 4, 5, 6 and 8), and six negative controls siRNAs. Corresponding fate profiles of transfected RKO cells treated with 100nM taxol. (B) Analysis of Myc mutants. Immunoblots show induction of GFP-tagged Myc, an RNAi-resistant mutant and Omomyc in RKO cells treated with 1  $\mu$ g/ml tetracycline. The asterisk marks a Myc-GFP cleavage product. Fate profiles as in (A). (C) Schematic showing how DMSO and JQ1 inhibit transcription of *MYC* and immunoblots confirming that DMSO and JQ1 inhibit Myc in RKO cells. (D) Immunoblots and fate profiles showing that a Myc-GFP cDNA is resistant to DMSO and JQ1 and restores the balance back towards death in mitosis.

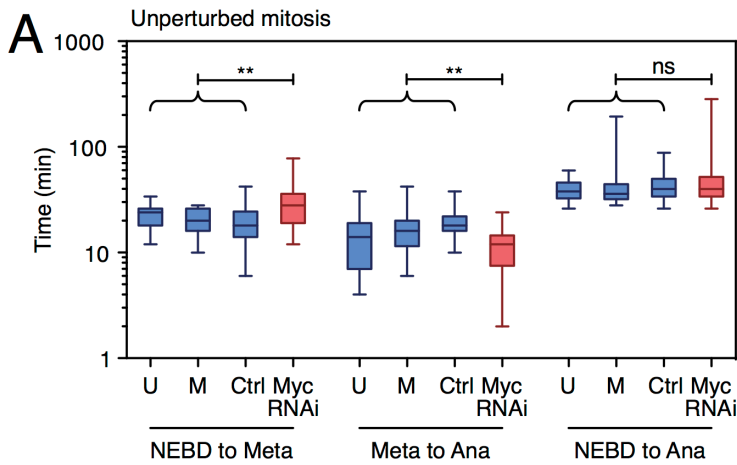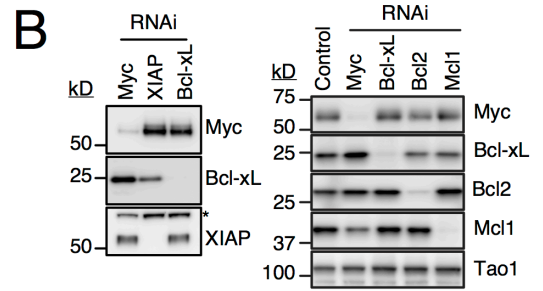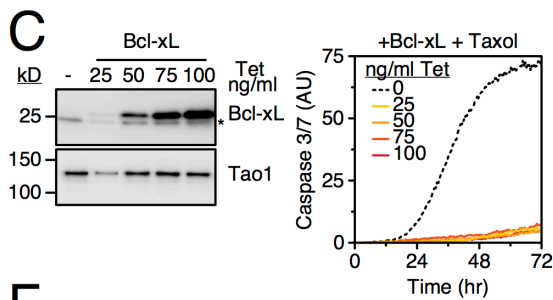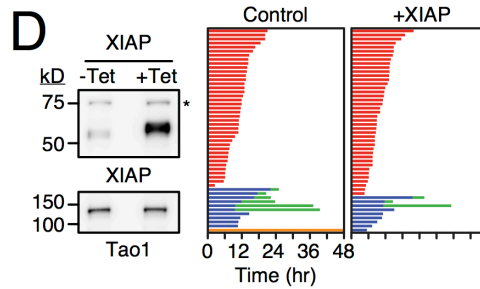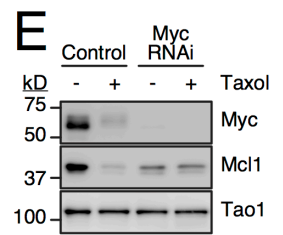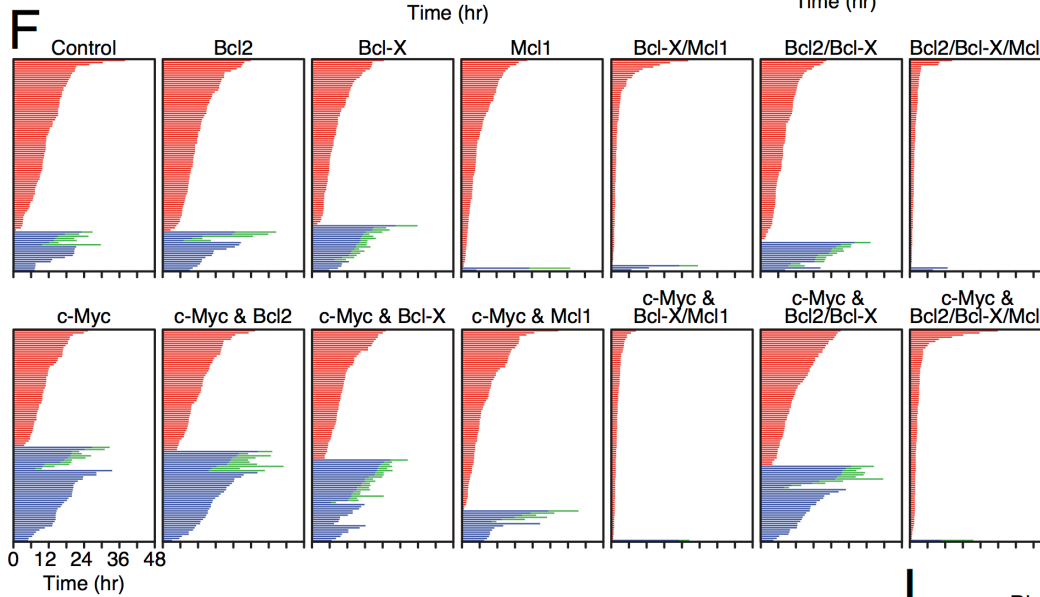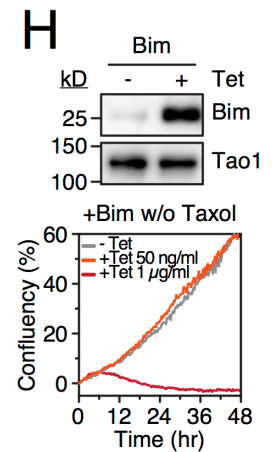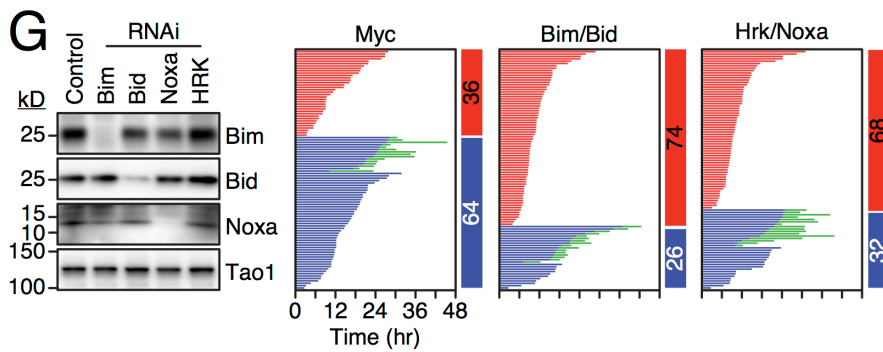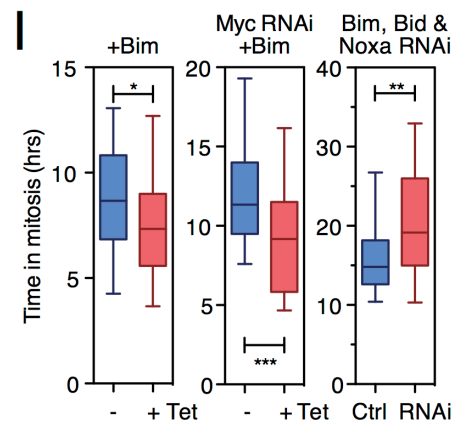

**Figure S3, related to Figure 3. Analysis of Bcl2-family members.** (A) Time lapse analysis of RKO cells expressing a GFP-tagged histone H2B, measuring the time from nuclear envelope breakdown (NEBD) to metaphase, from metaphase to anaphase and from NEBD to anaphase. Cells were either untreated (U), mock transfected (M), or transfected with siRNAs, either a non-targeting control (Ctrl) or the pool targeting Myc. Box-and-whisker plots show the median, interquartile ranges and full range. (B) Immunoblots showing RNAi-mediated inhibition of Myc, XIAP and pro-survival Bcl2 family proteins in RKO cells. Note that Myc RNAi results in up-regulation of Bcl-xL and down-regulation of Mcl1, but has no obvious effect on XIAP. Asterisk marks a non-specific background band. (C) Characterisation of a stable tet-inducible RKO cell line overexpressing Bcl-xL; immunoblot shows induction of Bcl-xL with a range of tetracycline concentrations. Asterisk marks the endogenous protein. Apoptosis assay shows that even low level induction of Bcl-xL is sufficient to block apoptosis induced by taxol. Note that 25ng/ml tetracycline increases Bcl-xL levels only two fold yet this is sufficient to block apoptosis. (D) Characterisation of a stable tet-inducible RKO cell line overexpressing XIAP; immunoblot shows induction of XIAP with 1  $\mu$ g/ml tetracycline. Asterisk marks a non-specific background band. Fate profile shows that tet-induced overexpression of XIAP does not inhibit DiM in 0.1  $\mu$ M taxol. (E) Immunoblot showing reduced Mcl1 levels in Myc RNAi cells. Consistent with Mcl1 being degraded in mitosis, Mcl1 is less abundant in taxol-treated cells. However, Mcl1 levels do not fall further in taxol-treated Myc RNAi cells, possibly due to inhibition of mitotic-specific degradation. (F) Fate profiles following RNAi-mediated inhibition of pro-survival Bcl2 family proteins showing that co-repression of Bcl-xL and Mcl1 leads to rapid DiM in 0.1  $\mu$ M taxol. (G) Immunoblots of RKO cells showing RNAi-mediated inhibition of the BH3-only proteins Bim, Bid and Noxa, and fate profiles showing that while Myc RNAi reduces DiM in 0.1  $\mu$ M taxol to 36% (compared to 69% in the corresponding control shown in Fig. 3D), repressing the BH3-only proteins, either in isolation (not shown) or in pairs as shown here, has little effect, with DiM remaining at ~70%. (H) Characterisation of an RKO tet-inducible cell line overexpressing Bim; immunoblot shows induction of Bim with 50 ng/ml tetracycline. The growth curves show that in the absence of taxol, overexpressing Bim to this level alone does not induce apoptosis. (I) Box-and-whisker plots (median, interquartile and 10-90 percentile range) showing the time spent arrested in mitosis following overexpression of Bim, either in control cells or following Myc RNAi, and following inhibition of Bim, Bid and Noxa. Note that overexpression of Bim accelerates death in mitosis while inhibition of the three BH3-only proteins delays death.

**Table S3, related to Figure 3. Nanostring gene expression profiling data. Used to generate Fig. 3A.**

|                         | Common name | Gene Name | Log2 fold change* | Reads   |                       | Common name | Gene Name | Log2 fold change* | Reads |
|-------------------------|-------------|-----------|-------------------|---------|-----------------------|-------------|-----------|-------------------|-------|
| <b>Apoptosis module</b> | AIF         | AIFM1     | -0.259            | 429     | <b>Mitosis module</b> | Apc1        | ANAPC1    | -0.645            | 569   |
|                         | Apaf1       | APAF1     | 0.211             | 263     |                       | Apc10       | ANAPC10   | -0.253            | 193   |
|                         | ATM         | ATM       | 0.144             | 59      |                       | Cenp-S      | APITD1    | -0.602            | 285   |
|                         | BAD         | BAD       | -0.039            | 69      |                       | Aurora A    | AURKA     | -0.552            | 1217  |
|                         | BAK         | Bak1      | 0.125             | 669     |                       | Aurora B    | AURKB     | -0.513            | 1315  |
|                         | BAX         | BAX       | -0.042            | 756     |                       | Survivin    | BIRC5     | -0.720            | 927   |
|                         | Bcl2        | BCL2      | -0.255            | 34      |                       | Bub1        | BUB1      | -0.435            | 1096  |
|                         | Bcl-XL      | BCL2L1    | 0.477             | 772     |                       | BubR1       | BUB1B     | -0.581            | 799   |
|                         | BimEL       | BCL2L11   | -0.668            | 26      |                       | Kn11        | CASC5     | -0.204            | 498   |
|                         | BID         | BID       | -0.912            | 187     |                       | Cyclin B1   | CCNB1     | -0.606            | 2911  |
|                         | cIAP        | BIRC3     | -0.187            | 60      |                       | Cdc20       | CDC20     | -0.416            | 1731  |
|                         | β-TrCP      | BTRC      | -0.180            | 194     |                       | Cdc25       | CDC25A    | -0.923            | 632   |
|                         | Caspase 3   | CASP3     | 0.318             | 359     |                       | Sororin     | CDCA5     | -0.540            | 895   |
|                         | Caspase 7   | CASP7     | -0.242            | 261     |                       | Cdh1        | CDK1      | -0.514            | 2734  |
|                         | Caspase 8   | CASP8     | -0.167            | 301     |                       | Cenp-E      | CENPE     | -0.332            | 542   |
|                         | Casp8a      | CASP8AP2  | -0.276            | 191     |                       | Cenp-F      | CENPF     | -0.246            | 1208  |
|                         | Caspase 9   | CASP9     | 0.202             | 76      |                       | Cenp-T      | CENPT     | 0.539             | 16    |
|                         | c-FLIP      | CFLAR     | 0.059             | 124     |                       | Separase    | ESPL1     | -0.231            | 337   |
|                         | CKII        | CSNK2B    | -0.289            | 2061    |                       | Haspin      | GSG2      | -0.441            | 396   |
|                         | ICAD        | DFFA      | -0.753            | 429     |                       | Augmin      | HAUS1     | -0.447            | 533   |
|                         | SMAC        | DIABLO    | -0.242            | 193     |                       | Eg5         | KIF11     | -0.519            | 695   |
|                         | E2F1        | E2F1      | -0.843            | 316     |                       | Mad2        | MAD2L1    | -0.762            | 1663  |
|                         | Fadd        | FADD      | 0.176             | 30      |                       | p31 comet   | MAD2L1BP  | -0.291            | 643   |
|                         | Fbw7        | FBW7      | -0.408            | 119     |                       | Greatwall   | MASTL     | -0.098            | 238   |
|                         | HRK         | HRK       | -0.543            | 17      |                       | Mis12       | MIS12     | -0.560            | 307   |
|                         | Omi         | HTRA2     | -0.257            | 80      |                       | Cap D2      | NCAPD2    | -0.414            | 1198  |
|                         | MULE        | HUWE1     | -0.278            | 767     |                       | Cap G       | NCAPG     | -0.383            | 763   |
|                         | p38         | MAPK14    | 0.016             | 550     |                       | Cap H       | NCAPH     | -0.630            | 632   |
|                         | JNK1        | MAPK8     | -0.282            | 516     |                       | Ndc80       | NDC80     | -0.331            | 332   |
|                         | JNK2        | MAPK9     | -0.143            | 546     |                       | Nde1        | NDE1      | -0.395            | 173   |
|                         | Max         | MAX       | -0.608            | 681     |                       | Plk1        | PLK1      | -0.579            | 1647  |
|                         | Mcl1        | MCL1      | -0.312            | 8220    |                       | Securin     | PTTG1     | -0.153            | 112   |
|                         | c-Myc       | MYC       | -1.085            | 3168    |                       | Sgo1        | SGOL1     | -0.167            | 336   |
| Pin1                    | PIN1        | -0.046    | 245               | Ska1    | SKA1                  | -0.331      | 335       |                   |       |
| NOXA                    | PMAIP1      | -1.080    | 270               | Smc1    | SMC1A                 | -0.519      | 278       |                   |       |
| PKA                     | PRKACA      | 0.149     | 794               | Smc2    | SMC2                  | -0.477      | 473       |                   |       |
| p53                     | TP53        | -0.379    | 205               | Spindly | SPDL1                 | -0.303      | 134       |                   |       |
| Tradd                   | TRADD       | 0.315     | 17                | SA2     | STAG2                 | -0.194      | 730       |                   |       |
| Usp9X                   | USP9X       | -0.011    | 934               | Megator | TPR                   | -0.108      | 435       |                   |       |
| XIAP                    | XIAP        | 0.128     | 327               | Tpx2    | TPX2                  | -0.460      | 1236      |                   |       |
| MIZ1                    | ZBTB17      | 0.223     | 40                | Mps1    | TTK                   | -0.517      | 338       |                   |       |
|                         |             |           |                   | UbcH10  | UBE2C                 | -0.429      | 3531      |                   |       |
|                         |             |           |                   | Wapl    | WAPAL                 | -0.381      | 779       |                   |       |
|                         |             |           |                   | Zw10    | ZW10                  | -0.199      | 266       |                   |       |

\*Values are the mean of 4 biological replicates

**A**

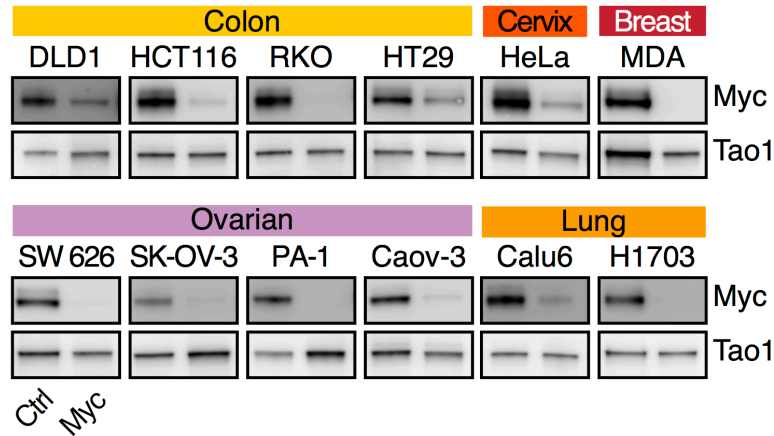

**B**

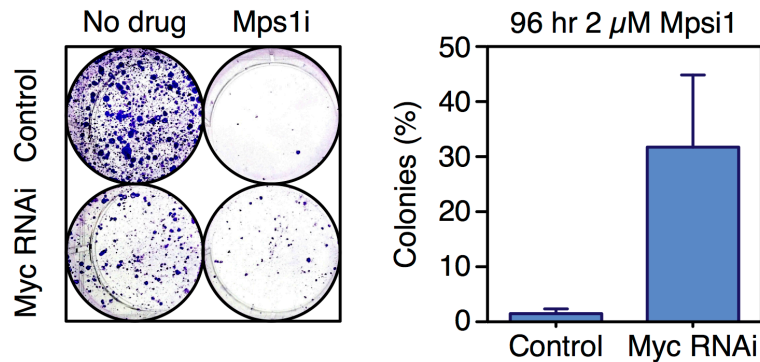

**C**

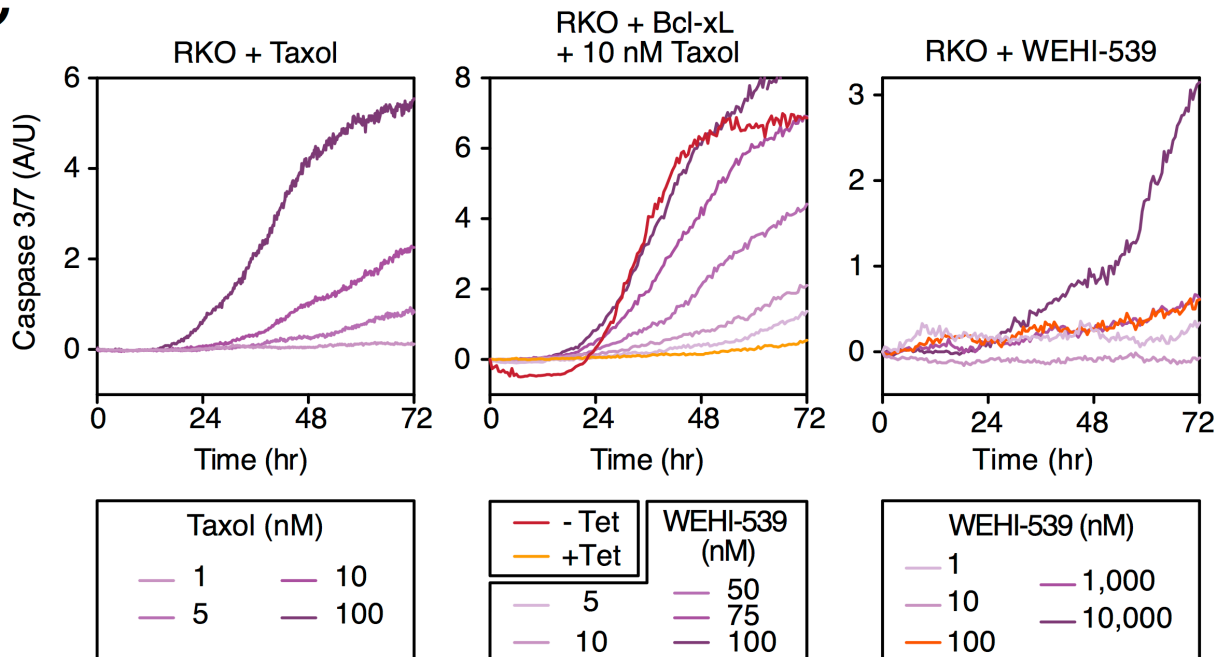

**Figure S4, related to Figure 4. Myc promotes post-mitotic death.** (A) Immunoblots showing RNAi-mediated inhibition of Myc in the panel of cell lines used in Fig. 4A. Each pair of lanes shows the non-targeting control on the left and the Myc siRNA on the right. (B) Colony formation assay of RKO cells 6 days following exposure to the Mps1 inhibitor AZ3146 for 96 hr. Values represent mean  $\pm$  SEM from three independent experiments. (C) Caspase 3/7 assays showing apoptosis induction in RKO cells. Left panel shows a taxol titration. 10 nM was selected for the experiment in Fig. 4D. Middle panel shows that tet-induction of Bcl-xL blocks apoptosis in the presence of 10 nM taxol but that this is reverted by titrating in the Bcl-xL inhibitor WEHI-539. 100 nM was selected for the experiment in Fig. 4D. Right panel shows that in the absence of antimetabolic agents, while 10  $\mu$ M WEHI-539 induces apoptosis, 100 nM is relatively benign.



**Table S4, related to Figure 4. Effect of c-Myc RNAi in response to 8 antimetabolic agents in 12 cell lines from different tumour types.**  
 Values represent IncuCyte-based Caspase 3/7 readings (AU) at 96 hrs used to generate Fig. 4A.

| Cell Line     | Taxol |       | Nocodazole |       | Eg5i<br>AZ138 |       | Plk1i<br>BI 2356 |       | Cenp-Ei<br>GSK923295 |       | Aurora Ai<br>MLN8054 |       | Aurora Bi<br>ZM447439 |       | Mps1i<br>AZ3146 |       |
|---------------|-------|-------|------------|-------|---------------|-------|------------------|-------|----------------------|-------|----------------------|-------|-----------------------|-------|-----------------|-------|
|               | Ctrl  | Myc   | Ctrl       | Myc   | Ctrl          | Myc   | Ctrl             | Myc   | Ctrl                 | Myc   | Ctrl                 | Myc   | Ctrl                  | Myc   | Ctrl            | Myc   |
| <b>Calu6</b>  | 510.0 | 389.5 | 498.5      | 338.0 | 355.5         | 259.5 | 479.5            | 407.0 | 555.0                | 350.0 | 391.5                | 296.5 | 464.5                 | 271.5 | 492.0           | 177.0 |
| <b>Caov3</b>  | 501.0 | 508.5 | 695.0      | 429.5 | 387.0         | 385.0 | 525.5            | 388.0 | 432.5                | 458.5 | 374.0                | 422.5 | 342.5                 | 278.5 | 430.0           | 492.0 |
| <b>DLD-1</b>  | 154.0 | 146.5 | 129.0      | 125.5 | 92.5          | 56.5  | 131.5            | 126.5 | 142.5                | 104.0 | 126.5                | 176.0 | 175.0                 | 167.5 | 228.5           | 84.5  |
| <b>H1703</b>  | 307.5 | 394.0 | 366.0      | 403.5 | 397.5         | 333.5 | 255.5            | 355.5 | 492.5                | 539.5 | 357.5                | 313.5 | 355.5                 | 367.0 | 352.5           | 275.0 |
| <b>HCT116</b> | 367.5 | 145.5 | 381.5      | 127.5 | 247.5         | 150.0 | 289.5            | 120.0 | 344.0                | 119.0 | 253.0                | 61.0  | 175.5                 | 31.0  | 552.0           | 223.0 |
| <b>HeLa</b>   | 149.0 | 68.5  | 198.0      | 142.0 | 145.0         | 78.0  | 128.0            | 57.5  | 141.0                | 76.0  | 104.0                | 88.0  | 110.0                 | 75.5  | 363.0           | 157.5 |
| <b>HT29</b>   | 304.5 | 156.0 | 251.0      | 126.5 | 187.5         | 188.0 | 210.5            | 113.5 | 335.5                | 311.5 | 212.5                | 99.0  | 282.5                 | 76.0  | 207.0           | 65.5  |
| <b>MDA</b>    | 57.0  | 3.0   | 32.5       | 8.0   | 70.0          | 8.5   | 31.5             | 2.0   | 37.0                 | 7.0   | 15.5                 | -1.0  | 35.5                  | 1.5   | 27.5            | 6.5   |
| <b>PAI</b>    | 70.0  | 51.8  | 37.1       | 19.6  | 59.5          | 30.1  | 51.8             | 38.5  | 70.0                 | 17.5  | 64.4                 | 23.8  | 78.4                  | 33.6  | 61.6            | 16.8  |
| <b>RKO</b>    | 452.5 | 329.5 | 567.0      | 205.0 | 402.0         | 201.0 | 272.0            | 32.0  | 311.5                | 272.5 | 194.5                | 44.0  | 143.0                 | 36.0  | 521.5           | 45.5  |
| <b>SKOV3</b>  | 150.5 | 77.0  | 65.0       | 31.0  | 75.5          | 57.5  | 117.5            | 58.5  | 83.5                 | 45.0  | 25.0                 | 12.0  | 29.0                  | 8.0   | 37.5            | 10.5  |
| <b>SW262</b>  | 20.0  | 15.5  | 13.5       | 9.5   | 16.0          | 9.0   | 20.0             | 9.0   | 20.5                 | 10.0  | 14.0                 | 10.5  | 13.5                  | 10.5  | 15.5            | 10.0  |

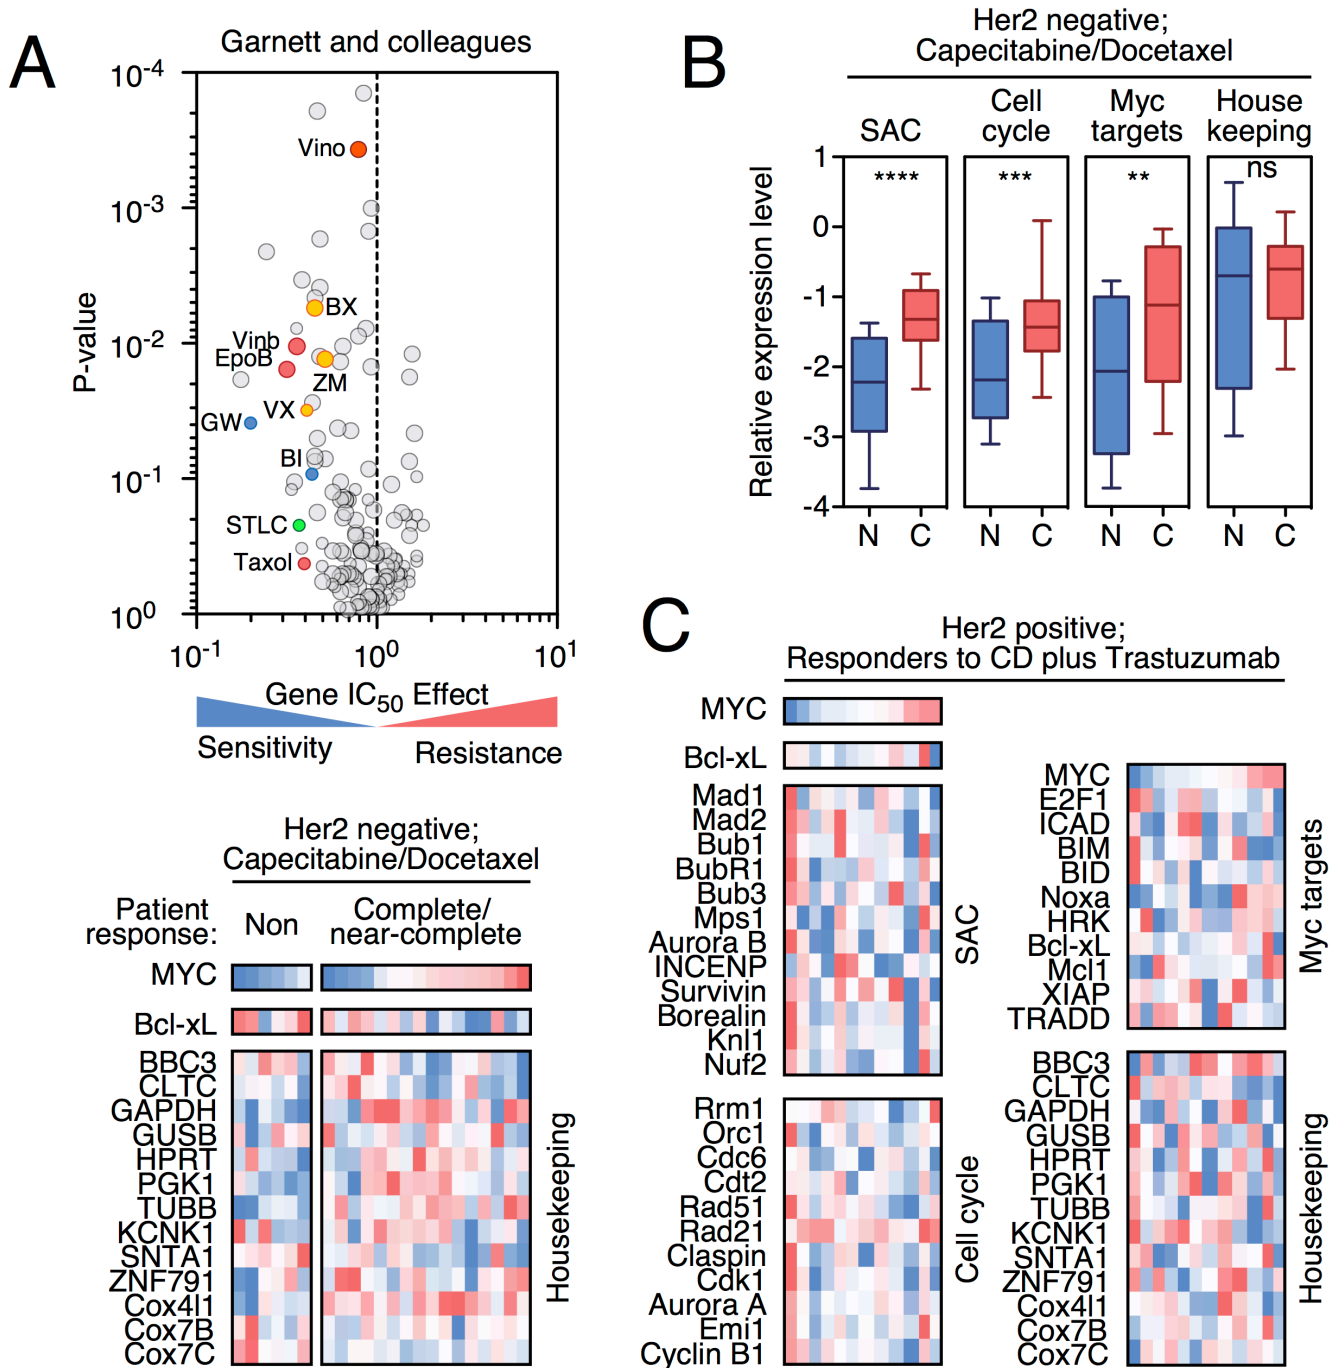

**Figure S5, related to Figure 5. Overexpression of Myc sensitizes cancer cells to antimetabolic agents.** (A) Volcano plot showing the gene  $IC_{50}$  effect and significance (inverted) of *MYC*-drug associations. Each circle represents a single drug effect and the size is proportional to the number of *MYC* overexpressing cell lines screened (range 26-50). Primary data is derived from [www.cancerrxgene.org](http://www.cancerrxgene.org) (Garnett et al., 2012; Yang et al., 2013). Taxol, vinorelbine, vinblastine and epothilone B are microtubule inhibitors; BX-795, ZM447439, and VX-680 are Aurora kinase inhibitors; GW843682X and BI-2536 are Plk1 inhibitors; *S*-Trityl-L-cysteine is an Eg5/KSP inhibitor. (B) Box-and-whisker plots (median, interquartile and full range) showing the relative expression levels of SAC, cell cycle and Myc-regulated apoptosis clusters in tumours that either do not respond (N) or show complete/near-complete responses (C) to capecitabine and docetaxel chemotherapy. (C) Heat maps showing gene expression profiles of 12 Her2-positive tumours treated with capecitabine and docetaxel plus Trastuzumab (responders), indicating no obvious correlation with Myc. As in Fig. 5C, each column represents a patient sample and the colour code indicates the relative expression level of the genes indicated, with the sample with the highest value dark red and the lowest value dark blue. Also shown are the housekeeping controls genes to accompany the data in Fig. 5C. Primary data for (B) and (C) are derived from (Glück et al., 2012).

**Table S5, related to Figure 5. Gene IC<sub>50</sub> effect data for MYC.** Used to generate Fig. 5B and S5A.  
**Source:** www.cancerxgene.org. Yang W, et al. Nucleic Acids Research (2013) 41; D955-61.

| Drug         | Drug Target                          | Effect | P-value | No. of mutations |
|--------------|--------------------------------------|--------|---------|------------------|
| Gemcitabine  | DNA replication                      | 0.199  | 0.020   | 47               |
| GW843682X    | PLK1                                 | 0.226  | 0.041   | 26               |
| Thapsigargin | ER Ca <sup>2+</sup> ATPase           | 0.266  | 0.002   | 47               |
| Epothilone B | Microtubules                         | 0.337  | 0.016   | 47               |
| CMK          | RSK                                  | 0.356  | 0.127   | 26               |
| Obatoclax    | BCL-2, BCL-XL, MCL-1                 | 0.374  | 0.110   | 47               |
| Vinblastine  | Microtubules                         | 0.387  | 0.011   | 50               |
| BMS-536924   | IGF1R                                | 0.387  | 0.008   | 26               |
| STLC         | KIF11                                | 0.396  | 0.233   | 26               |
| Sumitinib    | PDGFRA, PDGFRB, KDR, KIT, FLT3       | 0.404  | 0.355   | 26               |
| Cisplatin    | DNA crosslinker                      | 0.406  | 0.003   | 50               |
| Paclitaxel   | Microtubules                         | 0.414  | 0.457   | 26               |
| VX-680       | Aurora A/B/C, FLT3, ABL1, JAK2, TOP2 | 0.437  | 0.033   | 26               |
| Etoposide    | TOP2                                 | 0.456  | 0.029   | 47               |
| BI-2536      | PLK1/2/3                             | 0.464  | 0.096   | 26               |
| Cytarabine   | DNA synthesis                        | 0.467  | 0.072   | 50               |
| QS11         | ARFGAP                               | 0.468  | 0.005   | 47               |
| BX-795       | TBK1, PDK1, IKK, AURKB/C             | 0.476  | 0.006   | 49               |
| GSK-650394   | SGK3                                 | 0.480  | 0.077   | 47               |
| GDC-0449     | SMO                                  | 0.484  | 0.000   | 50               |
| GDC0941      | PI3K (class 1)                       | 0.485  | 0.054   | 49               |
| Camptothecin | TOP1                                 | 0.493  | 0.191   | 50               |
| AICAR        | AMPK agonist                         | 0.507  | 0.004   | 50               |
| Vorinostat   | HDAC inhibitor Class I, IIa, IIb, IV | 0.507  | 0.013   | 50               |
| TW 37        | BCL-2, BCL-XL                        | 0.510  | 0.002   | 49               |
| Tipifarnib   | Farnesyl-transferase (FNTA)          | 0.517  | 0.612   | 47               |
| BMS-509744   | ITK                                  | 0.521  | 0.314   | 26               |
| NVP-TAE684   | ALK                                  | 0.524  | 0.473   | 26               |
| ZM-447439    | AURKB                                | 0.528  | 0.014   | 49               |
| Mitomycin C  | DNA crosslinker                      | 0.538  | 0.076   | 47               |
| BMS-754807   | IGF1R                                | 0.578  | 0.131   | 47               |
| AZD6244      | MEK1/2                               | 0.579  | 0.371   | 49               |
| Roscovitine  | CDKs                                 | 0.583  | 0.631   | 27               |
| ATRA         | Retinoic acid receptor agonist       | 0.583  | 0.535   | 50               |
| JW-7-52-1    | MTOR                                 | 0.595  | 0.688   | 26               |
| AZD-2281     | PARP1/2                              | 0.619  | 0.044   | 50               |
| MS-275       | HDAC                                 | 0.628  | 0.591   | 27               |
| Doxorubicin  | DNA intercalating                    | 0.635  | 0.113   | 47               |
| MG-132       | Proteasome                           | 0.637  | 0.949   | 27               |

  

| Drug               | Drug Target                    | Effect | P-value | No. of mutations |
|--------------------|--------------------------------|--------|---------|------------------|
| BAY 61-3606        | SYK                            | 0.638  | 0.364   | 47               |
| Methotrexate       | Dihydrofolate reductase (DHFR) | 0.642  | 0.014   | 50               |
| Axitinib           | PDGFR, KIT, VEGFR              | 0.642  | 0.560   | 50               |
| Pazopanib          | VEGFR, PDGFRA, PDGFRB, KIT     | 0.644  | 0.735   | 47               |
| OSU-03012          | PDK1 (PDKP1)                   | 0.648  | 0.150   | 47               |
| Nilotinib          | ABL                            | 0.660  | 0.532   | 50               |
| CEP-701            | FLT3, JAK2, NTRK1, RET         | 0.663  | 0.206   | 50               |
| AZD7762            | CHK1/2                         | 0.664  | 0.011   | 50               |
| AS601245           | JNK                            | 0.665  | 0.381   | 47               |
| OSI-906            | IGF1R                          | 0.669  | 0.143   | 47               |
| PD-0325901         | MEK1/2                         | 0.674  | 0.153   | 49               |
| AG-014699          | PARP1, PARP2                   | 0.687  | 0.151   | 49               |
| Docetaxel          | Microtubules                   | 0.688  | 0.186   | 50               |
| PD-0332991         | CDK4/6                         | 0.694  | 0.995   | 49               |
| Bosutinib          | SRC, ABL, TEC                  | 0.706  | 0.538   | 50               |
| CCT018159          | HSP90                          | 0.710  | 0.152   | 49               |
| Elesclomol         | HSP70                          | 0.710  | 0.701   | 50               |
| GSK-1904529A       | IGF1R                          | 0.717  | 0.047   | 47               |
| Pyrimethamine      | Dihydrofolate reductase (DHFR) | 0.724  | 0.460   | 27               |
| Bexarotene         | Retinoic acid X family agonist | 0.726  | 0.535   | 47               |
| MK-2206            | AKT1/2                         | 0.733  | 0.555   | 49               |
| Parthenolide       | NFKB1                          | 0.756  | 0.127   | 27               |
| SB590885           | BRAF                           | 0.759  | 0.279   | 49               |
| SB 216763          | GSK3A/B                        | 0.760  | 0.213   | 48               |
| KU-55933           | ATM                            | 0.764  | 0.583   | 49               |
| JNJ-26854165       | MDM2                           | 0.770  | 0.264   | 49               |
| GSK269962A         | ROCK                           | 0.778  | 0.920   | 27               |
| AZD6482            | PI3Kb                          | 0.783  | 0.894   | 47               |
| CCT007093          | PPM1D                          | 0.783  | 0.474   | 49               |
| Vinorelbine        | Microtubules                   | 0.784  | 0.000   | 47               |
| LAQ824             | HDAC                           | 0.788  | 0.009   | 47               |
| CI-1040            | MEK1/2                         | 0.795  | 0.683   | 50               |
| NU-7441            | DNAPK                          | 0.810  | 0.967   | 49               |
| GW 441756          | NTRK1                          | 0.817  | 0.370   | 50               |
| AKT inhibitor VIII | AKT1/2                         | 0.820  | 0.370   | 47               |
| Lenalidomide       | TNF alpha                      | 0.823  | 0.354   | 50               |
| AUY922             | HSP90                          | 0.833  | 0.000   | 47               |
| IPA-3              | PAK                            | 0.838  | 0.957   | 47               |

|                    |                             |       |       |    |
|--------------------|-----------------------------|-------|-------|----|
| ABT-263            | BCL2, BCL-XL, BCL-W         | 0.853 | 0.303 | 49 |
| RDEA119            | MEK1/2                      | 0.856 | 0.008 | 49 |
| RO-3306            | CDK1                        | 0.881 | 0.794 | 49 |
| VX-702             | p38                         | 0.885 | 0.812 | 50 |
| Cyclopamine        | SMO                         | 0.886 | 0.269 | 27 |
| Embelin            | XIAP                        | 0.886 | 0.002 | 47 |
| A-443654           | AKT1/2/3                    | 0.894 | 0.154 | 26 |
| JNK-9L             | JNK                         | 0.904 | 0.088 | 47 |
| Bleomycin          | DNA damage                  | 0.905 | 0.001 | 47 |
| AZD8055            | mTORC1/2                    | 0.909 | 0.376 | 49 |
| KIN001-135         | IKKE                        | 0.914 | 0.956 | 27 |
| PD-173074          | FGFR1/3                     | 0.917 | 0.943 | 49 |
| PLX4720            | BRAF                        | 0.918 | 0.842 | 49 |
| EHT 1864           | Rac GTPases                 | 0.923 | 0.574 | 49 |
| Gefitinib          | EGFR                        | 0.924 | 0.847 | 50 |
| NVP-BEZ235         | PI3K (Class 1) and mTORC1/2 | 0.926 | 0.016 | 49 |
| Nutlin-3a          | MDM2                        | 0.950 | 0.182 | 49 |
| FH535              | unknown                     | 0.971 | 0.382 | 47 |
| JNK Inhibitor VIII | JNK                         | 0.975 | 0.392 | 49 |
| SL 0101-1          | RSK, AURKB, PIM3            | 0.975 | 0.814 | 49 |
| WH-4-023           | SRC family, ABL             | 0.986 | 0.709 | 26 |
| Bicalutamide       | Androgen receptor (ANDR)    | 0.990 | 0.958 | 47 |
| ABT-888            | PARP1/2                     | 0.995 | 0.837 | 50 |
| TGX221             | PI3K beta                   | 0.999 | 0.815 | 27 |
| PF-4708671         | p70 S6KA                    | 1.000 | 0.637 | 49 |
| Salubrinal         | GADD34-PP1C phosphatase     | 1.030 | 0.884 | 27 |
| NSC-87877          | SHP1/2 (PTN6/11)            | 1.050 | 0.937 | 47 |
| PF-562271          | FAK                         | 1.060 | 0.368 | 47 |
| BIRB 0796          | p38, JNK2                   | 1.080 | 0.763 | 49 |
| Bortezomib         | Proteasome                  | 1.090 | 0.594 | 27 |
| Bryostatins 1      | PRKC                        | 1.090 | 0.556 | 47 |
| 681640             | WEE1, CHK1                  | 1.090 | 0.472 | 49 |

|              |                                |       |       |    |
|--------------|--------------------------------|-------|-------|----|
| AMG-706      | VEGFR, RET, c-KIT, PDGFR       | 1.110 | 0.606 | 49 |
| FTI-277      | Farnesyl transferase (FNTA)    | 1.130 | 0.566 | 47 |
| Shikonin     | unknown                        | 1.140 | 0.395 | 47 |
| CGP-60474    | CDK1/2/5/7/9                   | 1.150 | 0.855 | 26 |
| Temsirolimus | MTOR                           | 1.170 | 0.116 | 50 |
| Lapatinib    | EGFR, ERBB2                    | 1.190 | 0.465 | 27 |
| CHIR-99021   | GSK3B                          | 1.190 | 0.216 | 47 |
| BMS-708163   | gamma-secretase                | 1.200 | 0.432 | 49 |
| Midostaurin  | KIT                            | 1.230 | 0.545 | 47 |
| Erlotinib    | EGFR                           | 1.240 | 0.424 | 23 |
| AZD-0530     | SRC, ABL1                      | 1.250 | 0.764 | 26 |
| CGP-082996   | CDK4                           | 1.260 | 0.534 | 26 |
| PAC-1        | CASP3 activator                | 1.260 | 0.643 | 47 |
| AZ628        | BRAF                           | 1.280 | 0.610 | 27 |
| Rapamycin    | MTOR                           | 1.300 | 0.546 | 26 |
| LFM-A13      | BTK                            | 1.310 | 0.191 | 47 |
| PF-02341066  | MET, ALK                       | 1.360 | 0.469 | 26 |
| XMD8-85      | ERK5 (MK07)                    | 1.390 | 0.200 | 27 |
| 17-AAG       | HSP90                          | 1.420 | 0.078 | 49 |
| A-770041     | SRC family                     | 1.430 | 0.629 | 26 |
| WZ-184       | BMX                            | 1.440 | 0.542 | 26 |
| DMOG         | Prolyl-4-Hydroxylase           | 1.440 | 0.018 | 47 |
| AP-24534     | ABL                            | 1.440 | 0.283 | 47 |
| AZD6482      | PI3Kb (P3C2B)                  | 1.470 | 0.012 | 47 |
| Imatinib     | ABL, KIT, PDGFR                | 1.490 | 0.240 | 26 |
| BIBW2992     | EGFR, ERBB2                    | 1.510 | 0.048 | 50 |
| Z-LLNle-CHO  | g-secretase                    | 1.560 | 0.103 | 26 |
| PHA-665752   | MET                            | 1.570 | 0.196 | 26 |
| GNF-2        | BCR-ABL                        | 1.580 | 0.405 | 26 |
| Dasatinib    | ABL, SRC, KIT, PDGFR           | 1.580 | 0.440 | 26 |
| Sorafenib    | PDGFRA, PDGFRB, KDR, KIT, FLT3 | 1.690 | 0.234 | 27 |

**Notes:** The volcano plot (Fig. S5A) visualises the correlation of drug sensitivity data with genetic events calculated using a multivariate ANOVA. Gene specific volcano plots represent the effect of a mutated gene (e.g. BRAF) on the responses to all drugs analysed. The volcano plot presents three pieces of data:

- x-axis: The magnitude of the effect that genetic events have on cell lines IC<sub>50</sub> values in response to a drug. IC<sub>50</sub> values were correlated with the status of commonly altered cancer genes using a two way multivariate ANOVA, with mutation status and tissue type as factors. The effect size is proportional to the difference in mean IC<sub>50</sub> between wild-type and mutant cell lines. Numbers less than 1 indicate drug sensitivity, numbers greater than 1 indicate drug resistance.
- y-axis: The p-value from the MANOVA of a drug-gene interaction on an inverted log10 scale.
- Size of each circle: The number of genetic events contributing to the analysis for a given gene or drug.

(See [www.cancerrxgene.org](http://www.cancerrxgene.org) for more details.)

**Table S6, related to Figure 5. Gene expression profiles and patient responses to Capecitabine/Docetaxel chemotherapy. Used to generate Fig. 5C and S5C. Source: www.oncomine.org. Glück et al (2012) Breast Cancer Res Treat. 132(3):781-91.**

| Sample Number | 35    | 34    | 37    | 33    | 32    | 36    | 124   | 113   | 117   | 125   | 123   | 114   | 110   | 119   | 118   | 122   | 112   | 111   | 116   | 115   | 121   | 120   |
|---------------|-------|-------|-------|-------|-------|-------|-------|-------|-------|-------|-------|-------|-------|-------|-------|-------|-------|-------|-------|-------|-------|-------|
| Response      | N     | N     | N     | N     | N     | N     | CR    | NC    | CR    | CR    | CR    | NC    | NC    | CR    | CR    | CR    | NC    | NC    | CR    | NC    | CR    | CR    |
| Aurora A      | -2.66 | -1.56 | -2.51 | -2.76 | -3.17 | -3.25 | -3.06 | -2.12 | -3.62 | -0.45 | -1.72 | -2.34 | -1.78 | -1.86 | -1.57 | -1.37 | -1.32 | -0.79 | -1.68 | -2.82 | -1.23 | -0.40 |
| Aurora B      | -2.31 | -1.71 | -1.94 | -2.00 | -2.12 | -1.56 | -2.01 | -1.64 | -2.07 | -1.90 | -1.69 | -2.07 | -1.74 | -1.66 | -1.18 | -0.85 | -0.62 | -0.95 | -2.03 | -2.46 | -0.78 | -0.64 |
| BBC3          | 0.09  | -0.06 | 0.34  | 0.13  | 0.18  | -0.23 | 0.26  | 0.06  | -0.03 | 0.45  | 0.03  | 0.10  | -0.26 | -0.04 | -0.39 | -0.31 | 0.04  | 0.00  | 0.15  | -0.18 | -0.16 | -0.41 |
| Bel-xL        | 0.18  | 0.10  | -0.62 | -0.24 | -0.14 | 0.25  | -0.05 | -0.35 | 0.04  | -0.09 | -0.37 | -0.15 | -0.49 | -0.14 | -0.69 | -0.33 | -0.46 | -0.74 | -0.71 | 0.05  | -0.63 | -0.39 |
| Bid           | -0.43 | 0.43  | -0.91 | -0.51 | -0.92 | -1.19 | 0.13  | -0.01 | -1.49 | -0.54 | 0.22  | -0.27 | 0.27  | 0.88  | 0.74  | 0.92  | 0.53  | -0.10 | -0.04 | -0.49 | 0.18  | 0.34  |
| Bim           | -0.45 | -0.43 | -0.39 | -0.84 | -0.94 | -0.80 | -0.90 | -0.63 | -0.67 | -0.66 | -0.17 | -0.42 | -0.29 | -0.03 | -0.53 | -0.14 | -0.66 | 0.62  | -0.85 | -0.73 | -0.14 | 0.50  |
| Borealin      | -2.63 | -1.38 | -2.31 | -2.11 | -2.69 | -3.19 | -2.54 | -1.09 | -3.30 | -0.76 | -0.49 | -1.99 | -1.92 | -1.55 | -0.47 | -1.33 | -1.13 | -1.25 | -1.38 | -2.44 | -0.41 | 0.32  |
| Bub1          | -3.37 | -1.81 | -3.76 | -3.17 | -3.70 | -4.66 | -3.69 | -2.27 | -5.04 | 3.03  | -1.91 | -2.48 | -1.45 | -1.84 | -1.18 | -1.39 | -2.08 | -1.23 | -2.33 | -3.86 | -1.99 | -0.85 |
| Bub3          | -2.09 | -1.52 | -0.90 | -0.62 | -1.42 | -2.17 | -1.22 | -1.23 | -1.11 | -0.27 | 0.04  | -0.84 | -1.38 | -0.75 | -0.91 | -0.73 | -1.33 | 1.03  | -1.03 | -1.46 | 0.39  | -0.48 |
| BubR1         | -1.64 | -1.07 | -3.36 | -1.78 | -2.39 | -2.07 | -2.26 | -2.15 | -1.97 | -2.30 | -1.93 | -1.47 | -1.07 | -1.85 | -1.44 | -1.33 | -1.40 | -1.93 | -1.72 | -2.11 | -0.93 | -0.37 |
| Cdc6          | -2.57 | -2.71 | -3.03 | -2.98 | -2.87 | -3.77 | -3.68 | -2.76 | -3.75 | 0.29  | -1.52 | -2.85 | -1.39 | -1.55 | -1.86 | -2.18 | -1.68 | -1.82 | -2.76 | -3.65 | -2.24 | -1.36 |
| CDK1          | -3.30 | -2.18 | -2.64 | -2.54 | -3.81 | -4.14 | -2.66 | -1.99 | -4.35 | -1.46 | -1.75 | -1.69 | -1.64 | -0.78 | -0.50 | -0.14 | -1.24 | -0.67 | -1.11 | -3.10 | -0.81 | -1.00 |
| Cdt2          | -1.50 | 0.63  | -1.32 | -2.01 | -2.61 | -3.22 | -2.51 | -1.81 | -3.41 | -1.39 | -0.83 | -1.99 | -2.05 | -1.17 | -0.99 | 0.04  | -0.88 | 0.07  | -0.96 | -2.06 | -2.17 | -0.69 |
| Claspain      | -0.93 | -0.42 | -1.20 | -0.90 | -1.36 | -1.28 | -1.23 | -1.02 | -2.10 | -0.21 | -0.89 | -0.84 | -0.60 | 0.09  | -1.05 | -0.67 | -1.49 | 0.16  | -1.20 | -1.48 | -0.02 | -0.10 |
| CLTC          | -0.51 | -0.23 | -0.34 | -0.57 | -0.33 | -0.82 | 0.00  | 0.50  | 2.79  | -0.07 | -0.33 | -0.61 | -0.26 | -0.67 | -0.85 | -0.70 | -0.35 | 1.49  | -0.68 | -0.77 | -0.60 | -0.91 |
| Cox4I1        | -1.68 | -2.14 | -0.47 | -0.79 | -1.00 | -0.92 | -0.12 | -0.45 | -0.48 | -0.12 | -0.58 | -0.22 | -0.99 | -0.03 | -0.38 | 0.24  | 0.27  | -0.04 | -0.33 | -0.85 | 0.09  | -0.54 |
| Cox7B         | 0.35  | 2.24  | -0.54 | -0.15 | -0.86 | 0.55  | -0.18 | -0.73 | -0.70 | 0.79  | 0.12  | -0.50 | -0.01 | 0.75  | -0.03 | 0.35  | -1.69 | 0.37  | -0.08 | 0.06  | 0.36  | -0.06 |
| Cox7C         | 1.30  | 2.10  | -0.07 | 0.08  | -0.16 | 0.99  | -0.26 | -0.68 | 0.03  | 0.04  | -0.34 | -0.19 | -0.91 | -0.58 | -0.53 | -0.06 | -0.88 | 0.24  | -0.40 | 0.36  | -0.24 | -0.43 |
| E2F1          | -1.46 | -0.75 | -1.92 | -2.06 | -2.63 | -2.43 | -1.84 | -0.97 | -2.53 | -1.08 | 0.18  | -1.44 | -0.95 | 0.11  | -0.14 | -0.25 | -1.29 | -0.52 | -0.20 | -1.58 | -1.18 | -0.03 |
| Emil          | -2.42 | -2.19 | -2.48 | -1.58 | -2.05 | -3.31 | -2.21 | -1.99 | -2.99 | -1.69 | -0.73 | -1.28 | -0.72 | -1.29 | -1.36 | -1.12 | -1.64 | -1.51 | -1.58 | -2.62 | -0.41 | 0.13  |
| GAPDH         | -1.94 | -2.58 | -1.69 | -1.94 | -2.39 | -2.58 | -1.87 | -1.88 | -2.41 | -0.78 | -0.49 | -0.50 | -1.20 | -0.97 | -0.68 | -0.90 | -1.50 | -2.07 | -1.30 | -2.45 | -0.56 | -0.95 |
| GUSB          | 0.35  | -0.58 | -0.14 | 0.54  | 0.17  | 0.33  | 0.73  | -0.17 | 0.07  | -0.03 | 0.19  | 0.35  | -0.08 | -0.22 | 0.52  | 0.16  | 0.02  | 0.17  | 0.11  | 0.81  | -0.17 | -0.33 |
| HPRT          | -1.42 | 0.33  | -1.26 | -1.58 | -1.65 | -2.85 | -1.20 | -1.89 | -1.86 | -0.24 | -0.10 | -0.66 | -0.99 | 0.79  | -0.54 | -0.11 | -0.60 | -0.27 | -0.64 | -1.78 | -1.06 | -0.55 |
| HRK           | -0.34 | -0.34 | 0.01  | -0.67 | -0.42 | -0.74 | 0.20  | -0.03 | -0.84 | 0.23  | 1.74  | 0.78  | 0.53  | 0.32  | -0.41 | -0.04 | -0.21 | -0.26 | -0.46 | -0.14 | 0.93  | 0.46  |
| ICAD          | -1.10 | -1.17 | -0.97 | -0.57 | -0.91 | -1.46 | -0.80 | -0.71 | -1.59 | -1.19 | -0.49 | -0.70 | -1.17 | -0.11 | -0.04 | 0.14  | -0.26 | -0.92 | -0.24 | -0.95 | -0.06 | 0.54  |
| INCENP        | -1.27 | 0.26  | -2.58 | -1.39 | -1.87 | -2.03 | -1.55 | -0.08 | -2.86 | -1.25 | 0.38  | -0.94 | -1.08 | -1.16 | -0.58 | 0.78  | 0.60  | -0.69 | 0.00  | -1.19 | -0.33 | -0.75 |
| KCNK1         | 3.02  | 0.24  | 2.71  | -1.12 | -0.64 | -0.75 | 0.34  | 1.37  | -2.02 | 1.09  | 2.41  | 1.44  | 1.21  | 1.46  | 1.26  | 1.91  | -0.70 | -2.22 | -0.23 | 0.36  | 0.91  | -1.94 |
| KnI1          | -2.21 | -0.82 | -2.01 | -1.96 | -1.98 | -2.57 | -2.61 | -1.76 | -2.96 | -1.65 | -1.33 | -1.71 | -1.43 | -1.37 | -1.84 | -0.63 | -1.22 | -0.73 | -1.32 | -2.40 | -1.02 | -0.97 |
| Mad1          | -1.79 | -1.62 | -1.13 | -0.87 | -1.19 | -1.63 | -0.87 | -0.87 | -1.03 | -0.47 | -0.87 | -0.85 | -1.30 | -0.49 | -1.04 | -0.89 | -0.13 | 0.39  | -1.14 | -1.58 | -1.12 | -0.86 |
| Mad2          | -5.03 | -3.59 | -2.95 | -2.26 | -3.09 | -5.54 | -2.94 | -2.69 | -4.16 | -1.54 | -1.55 | -1.62 | -1.82 | -1.37 | -1.25 | -1.11 | -0.68 | -0.75 | -0.94 | -3.89 | -0.79 | -0.72 |
| McI1          | -0.66 | -1.25 | 0.02  | 0.15  | -0.29 | -0.48 | 0.10  | 1.09  | -0.69 | 0.34  | 0.95  | 0.00  | 1.23  | 0.56  | 0.81  | 0.03  | 0.63  | 0.39  | 0.66  | -0.16 | 0.41  | 1.34  |
| Mps1          | -2.54 | -1.86 | -3.28 | -2.11 | -2.79 | -3.60 | -3.22 | -2.21 | -3.74 | -1.48 | -0.57 | -1.59 | -0.90 | -1.20 | -0.28 | -0.27 | -0.15 | -0.15 | -1.14 | -3.36 | -1.12 | 0.35  |
| MYC           | -3.20 | -3.11 | -2.91 | -2.78 | -2.55 | -2.17 | -3.18 | -3.07 | -2.96 | -2.84 | -2.24 | -1.91 | -1.91 | -1.67 | -1.20 | -1.05 | -1.02 | -0.88 | -0.77 | -0.51 | 0.38  | 1.37  |
| Noxa          | -1.98 | -2.25 | -2.68 | -2.01 | -0.28 | -3.69 | -1.47 | -3.40 | -4.13 | -1.71 | -0.66 | -2.26 | -1.74 | -3.29 | -1.67 | -4.12 | -1.52 | -1.18 | -2.31 | -2.55 | -2.25 | -0.38 |
| Nuf2          | -3.17 | -1.50 | -2.44 | -2.73 | -3.27 | -3.97 | -2.60 | -1.31 | -3.50 | -2.76 | -0.72 | -1.43 | -0.67 | -1.36 | -0.16 | -0.63 | -0.41 | -0.49 | -0.66 | -2.71 | -0.45 | 1.24  |
| Orc1          | -1.80 | -2.44 | -2.39 | -2.15 | -2.18 | -1.35 | -1.96 | -2.44 | -2.71 | -1.97 | -0.57 | -2.15 | -1.46 | -1.32 | -1.93 | -2.02 | -0.90 | -2.49 | -2.78 | -1.99 | -1.02 | -1.27 |
| PGK1          | -1.34 | -1.87 | -2.22 | -2.04 | -2.44 | -2.24 | -1.57 | -1.90 | -2.56 | -1.09 | -1.00 | -0.19 | -1.15 | -1.06 | -1.11 | -0.65 | -1.58 | -1.69 | -1.78 | -2.10 | -1.39 | -1.96 |

| Sample Number | 35    | 34    | 37    | 33    | 32    | 36    | 124   |       | 117   |       | 125   |       | 123   |       | 114   |       | 110   |       | 119   |       | 118   |       | 122   |       | 112   |       | 111   |       | 116   |       | 115   |       | 121   |       | 120   |  |
|---------------|-------|-------|-------|-------|-------|-------|-------|-------|-------|-------|-------|-------|-------|-------|-------|-------|-------|-------|-------|-------|-------|-------|-------|-------|-------|-------|-------|-------|-------|-------|-------|-------|-------|-------|-------|--|
|               | N     | N     | N     | N     | N     | N     | CR    | NC    | CR    |  |
| Rad21         | -1.71 | -1.38 | -0.77 | -0.58 | -0.26 | -1.66 | 0.16  | 0.05  | 1.35  | -1.09 | 0.25  | 0.16  | -0.16 | -0.97 | -0.03 | -0.11 | -0.20 | -0.97 | -0.03 | -0.11 | -0.20 | 0.52  | 0.37  | 0.80  | 0.52  | 0.37  | 0.80  | -0.43 | 0.46  | 0.47  | 0.47  | 0.47  | 0.47  | 0.47  | 0.47  |  |
| Rad51         | -2.31 | -0.92 | -2.56 | -2.00 | -2.89 | -3.25 | -2.32 | -1.81 | -3.47 | -1.53 | -0.78 | -2.36 | -2.36 | -0.66 | -1.16 | -0.99 | -0.49 | -0.66 | -1.16 | -0.99 | -0.99 | -0.49 | -0.52 | -1.42 | -0.32 | -0.52 | -1.42 | -2.61 | -1.86 | -0.46 | -0.46 | -0.46 | -0.46 | -0.46 | -0.46 |  |
| Rrm1          | -2.18 | -1.52 | -0.97 | -0.61 | -1.38 | -1.98 | -1.82 | -1.23 | -1.83 | -1.29 | -1.07 | -1.76 | -1.76 | -0.62 | -1.82 | -0.56 | -0.77 | -0.62 | -1.82 | -0.56 | -0.56 | -0.77 | -0.47 | -0.77 | -1.74 | -0.47 | -0.77 | -1.74 | -1.19 | -0.84 | -0.52 | -0.52 | -0.52 | -0.52 | -0.52 |  |
| SNTA1         | -0.14 | -0.04 | 0.05  | -0.14 | -0.01 | 0.61  | -0.20 | -0.25 | 0.00  | 0.13  | -0.46 | 0.04  | 0.04  | -0.09 | -0.55 | -0.50 | -0.34 | -0.09 | -0.55 | -0.50 | -0.50 | -0.34 | -0.45 | -0.81 | -0.60 | -0.45 | -0.81 | 0.47  | -0.61 | -0.73 | -0.73 | -0.73 | -0.73 | -0.73 | -0.73 |  |
| Survivin      | -3.17 | -1.57 | -3.14 | -1.96 | -3.47 | -4.38 | -3.12 | -1.11 | -3.49 | -1.33 | -1.37 | -0.85 | -0.85 | -1.78 | -1.45 | -0.97 | -1.35 | -1.78 | -1.45 | -0.97 | -0.97 | -1.35 | 0.92  | 0.51  | -2.18 | 0.92  | 0.51  | -2.18 | -2.58 | 1.20  | -0.94 | -0.94 | -0.94 | -0.94 | -0.94 |  |
| TRADD         | -2.44 | -2.37 | -0.77 | -0.90 | -0.90 | -2.29 | -0.25 | 0.00  | -0.89 | -0.38 | -0.04 | -0.62 | -0.62 | -0.47 | -0.17 | -0.47 | -0.55 | -0.47 | -0.17 | -0.47 | -0.47 | -0.55 | 1.11  | -0.65 | -0.52 | 1.11  | -0.65 | -0.52 | -1.55 | -0.47 | -0.15 | -0.15 | -0.15 | -0.15 |       |  |
| TUBB          | -2.50 | -2.45 | -1.53 | -1.35 | -1.39 | -2.07 | -1.18 | -0.41 | -1.77 | -1.09 | -1.30 | -1.35 | -1.35 | -0.77 | -1.07 | -0.44 | -0.68 | -0.77 | -1.07 | -0.44 | -0.44 | -0.68 | -0.73 | -1.73 | -0.63 | -0.73 | -1.73 | -1.72 | 0.00  | -0.47 | -0.47 | -0.47 | -0.47 | -0.47 |       |  |
| XIAP          | 0.60  | -0.45 | 1.89  | -0.75 | 0.23  | 0.27  | 0.02  | -0.33 | 0.33  | 1.26  | 0.72  | 0.91  | 0.91  | 0.48  | 1.34  | 0.00  | 0.35  | 0.48  | 1.34  | 0.00  | 0.00  | 0.35  | -1.28 | 0.93  | 0.86  | -1.28 | -0.32 | 0.33  | 0.11  | 0.11  | 0.11  | 0.11  | 0.11  | 0.11  |       |  |
| ZNF791        | -0.93 | -1.06 | 0.00  | 0.05  | 0.35  | -0.55 | -0.27 | 0.60  | 0.65  | -0.05 | -0.16 | -0.63 | -0.63 | 0.15  | 0.35  | -0.21 | -0.30 | 0.15  | 0.35  | -0.21 | -0.21 | -0.30 | -0.07 | -0.96 | 0.07  | -0.07 | -0.01 | 0.38  | 0.48  | 0.48  | 0.48  | 0.48  | 0.48  |       |       |  |

Values represent Log2 median-centered ratio.

<sup>1</sup> Patient treatment response: N, no response; NC, near complete response; CR, complete response.

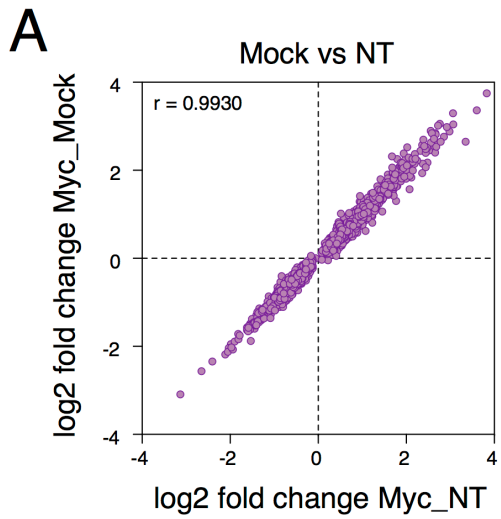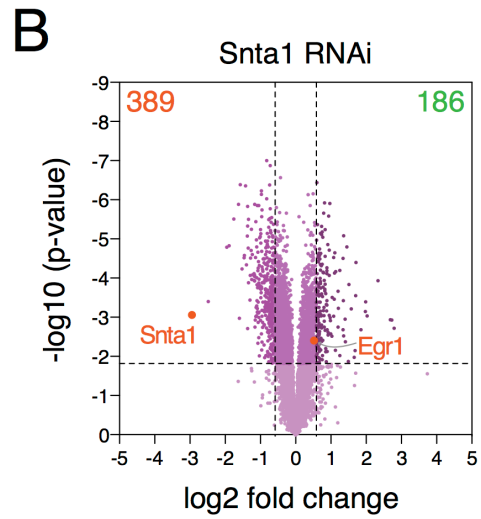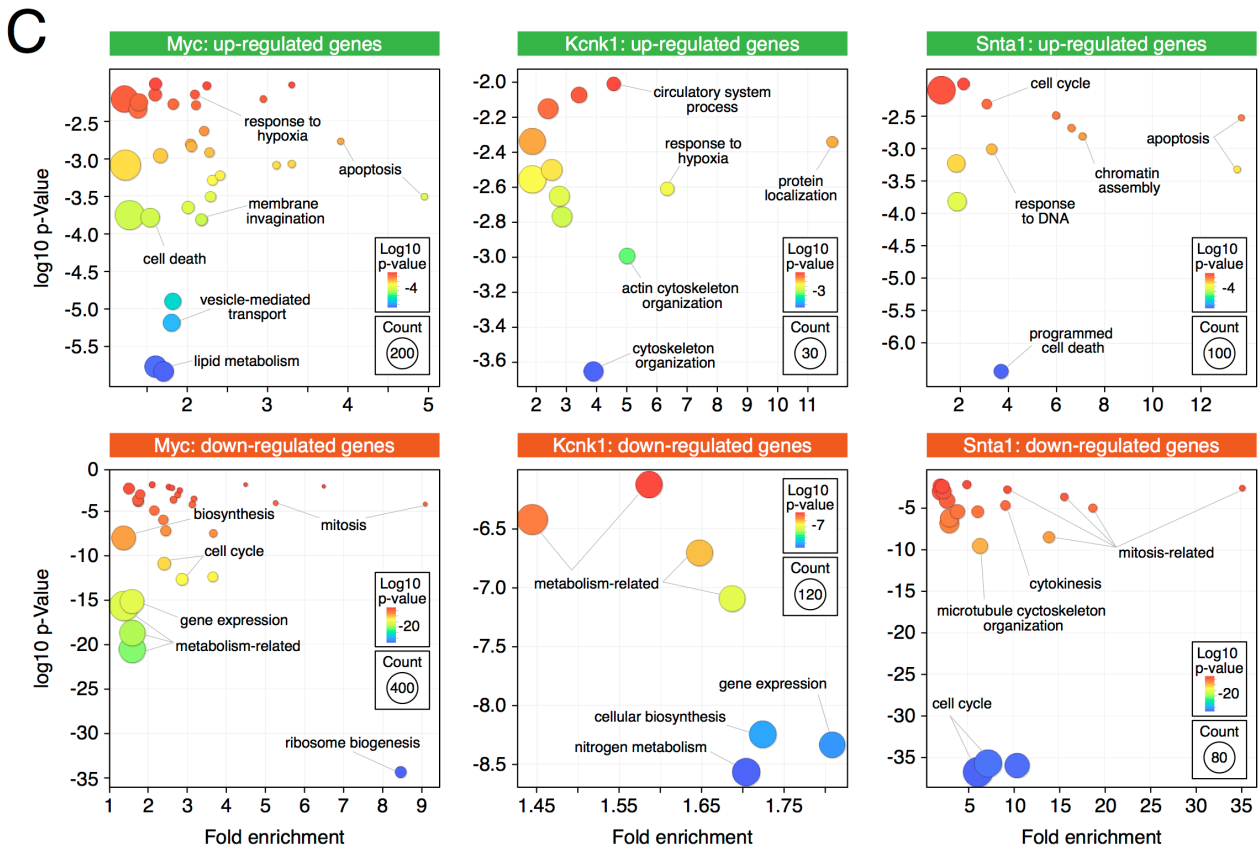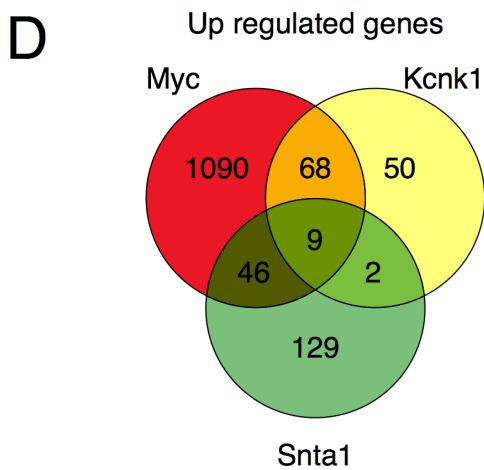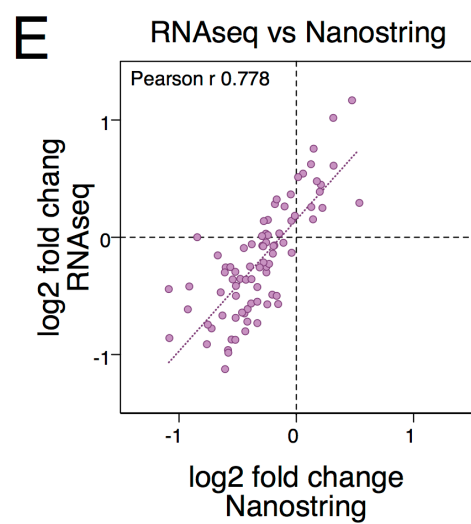

**Figure S6, related to Figure 7. Global gene expression profiling.** (A) Gene expression fold changes following Myc RNAi, normalized to either mock transfected ( $y$ -axis) or cells transfected with a non-targeting control siRNA ( $x$ -axis). Each value is the average derived from five biological replicates for mock and four each for the non-targeting control and Myc siRNA. Because of the excellent correlation, all subsequent analysis was performed with values normalized to the non-targeting control siRNA. (B) Volcano plot showing the gene expression changes induced by transfection of *SNTA1* siRNA #4. (C) Gene ontology analysis of the up and downregulated genes following transfection of siRNAs targeting Myc, Kcnk1 and Snta1. Gene Ontology analysis was performed with DAVID Bioinformatics Resources 6.7 (Huang da et al., 2009) then visualized with Revigo (Supek et al., 2011). The Snta1 siRNA deregulated 575 genes, with *SNTA1* itself the most repressed gene. Cell cycle and mitosis-related gene ontology terms feature heavily, consistent with this siRNA accelerating mitotic exit. Interestingly, FoxM1, which drives G2/M gene expression was reduced 1.75-fold (not shown), indicating that this siRNA may disrupt mitotic controls by deregulating FoxM1 (Laoukili et al., 2005). (D) Venn diagram showing the number of common upregulated genes. (E) Fold changes for the genes analyzed in Fig. 3A showing good correlation between the Nanostring and RNAseq-based measurements.

**Table S7, related to Figure 7.** RNA-Seq-derived gene expression analysis. Used to generate Fig. 7A and S6B. (Provided as an Excel file).



**A**

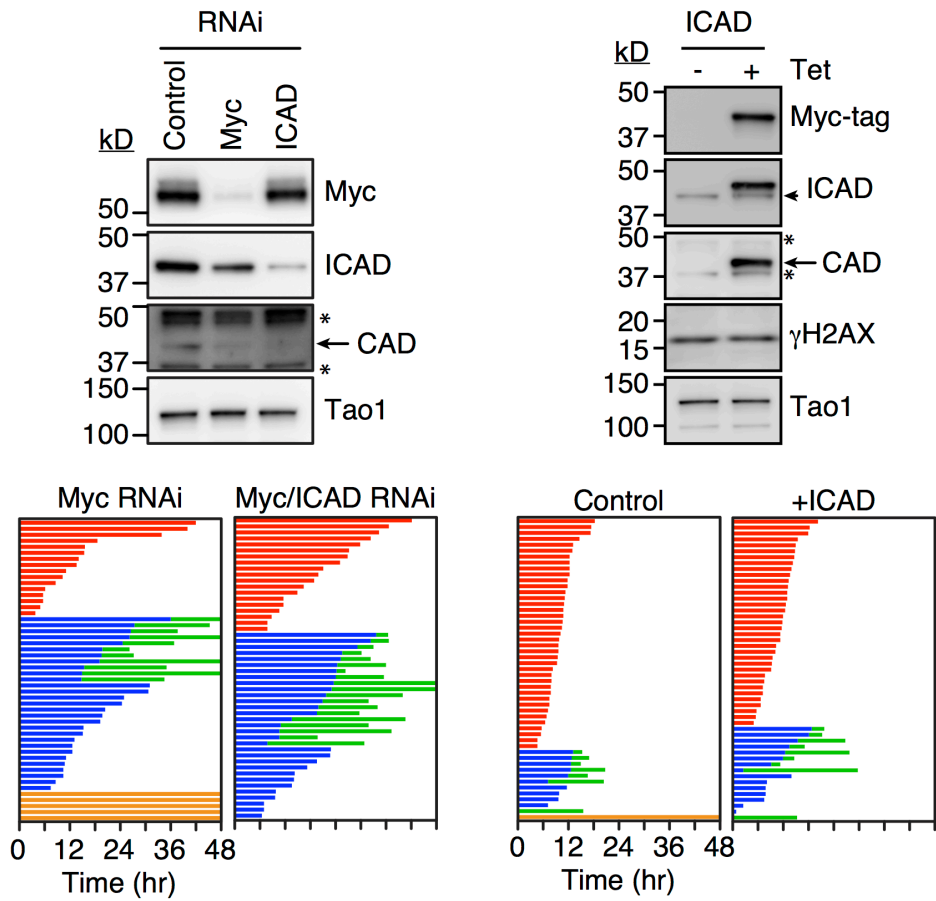

**B**

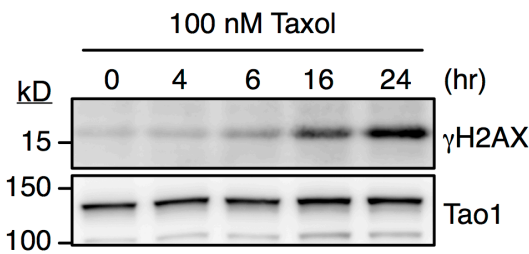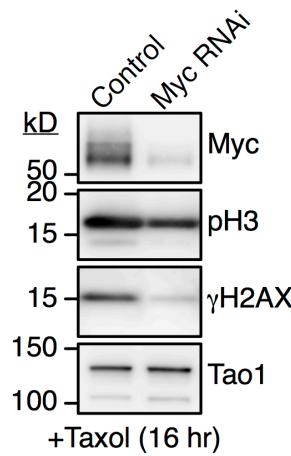

**D**

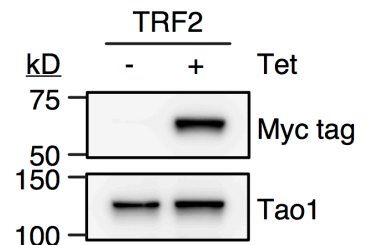

**C**

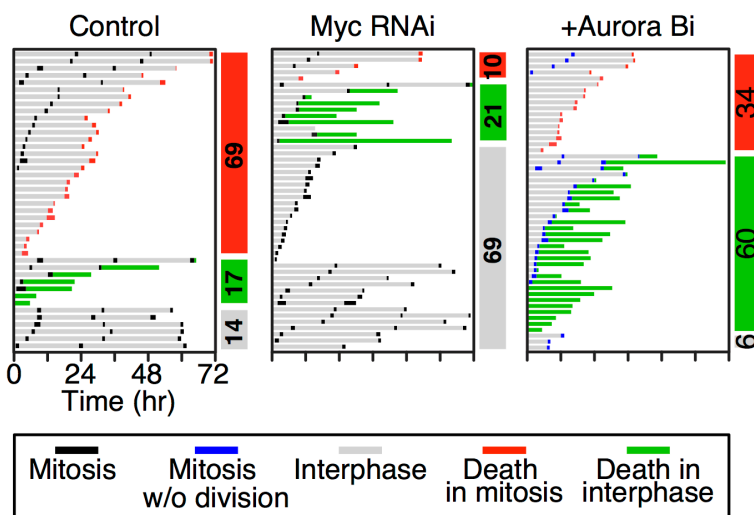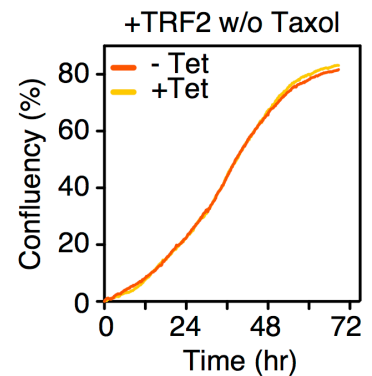

**Figure S7, related to Figure 8. Inhibition of ICAD/CAD and telomere deprotection enhances slippage.** (A) Characterisation of ICAD RNAi and overexpression. Immunoblots show that inhibition of either Myc or ICAD reduces CAD levels. Fate profiles show that RNAi-mediated inhibition of ICAD in Myc RNAi cells does not further suppress DiM. Tet-induced overexpression of ICAD elevates levels of CAD but this has no obvious effect on DNA damage or DiM. Asterisks mark non-specific bands. (B) Immunoblot shows that taxol exposure induces  $\gamma$ H2AX, indicating DNA damage, and that this is suppressed by Myc RNAi. (C) Fate profiles of RKO cells in the absence of taxol following RNAi-mediated co-repression of Bcl-xL and Mcl1. In contrast to fate profiles of taxol-treated cells, here, zero hr represents when imaging started as opposed to when the cell first entered mitosis. 69% of Bcl-xL/Mcl1-deficient cells undergo DiM, indicating that in the absence of pro-survival function, mitosis is a significant stress, inducing apoptosis without the addition of taxol. Co-repression of Myc reduces DiM in Bcl-xL/Mcl1-deficient cells to 10%, consistent with Myc counterbalancing pro-survival function. Exposing Bcl-xL/Mcl1-deficient cells to 2  $\mu$ M ZM447439, a selective Aurora B inhibitor (Ditchfield et al., 2003), also reduces DiM in the absence taxol, to 34%. Note that Aurora B promotes telomere deprotection upon mitotic entry, activating a DNA damage signal (Hayashi et al., 2012). (D) Characterisation of a tet-inducible RKO cell line overexpressing the shelterin component TRF2, tagged with an N-terminal Myc epitope. Immunoblot shows induction of TRF2 with 1  $\mu$ g/ml tetracycline and growth curves shows that, in the absence of taxol, this does not inhibit proliferation.

## Supplemental Experimental Procedures

### Cell lines

Colon carcinoma lines (RKO, DLD-1, HCT116, HT29), lung carcinoma lines (Calu6 and H1703) breast (MDA-MB-231) and ovarian cancer lines (SKOV3, PA1, SW626, Caov3) were obtained from the American Type Culture Collection. HeLa cells were as described (Taylor and McKeon, 1997), HCT116 p53<sup>-/-</sup> were provided by Bert Vogelstein (Bunz et al., 1998). Cells were cultured in DMEM plus 10% fetal calf serum (LifeTechnologies), 2 mM glutamine, 100 U/ml penicillin, and 100 U/ml streptomycin (Lonza). For PA1, SW626 and SKOV3, DMEM was replaced by Minimum Essential Media, Leibovitz's L-15 (Sigma-Aldrich) and McCoy's (modified) 5A medium (Life Technologies) respectively. All lines were grown at 37°C in a humidified 5% CO<sub>2</sub> incubator. For the tertiary screen, we use an RKO line expressing a GFP-tagged histone H2B (Gascoigne and Taylor, 2008) so that mitotic index could be approximated by measuring the granularity of the chromatin.

### siRNA sequences

The sequences of siRNAs used in this study are listed below. All siRNAs were from Dharmacon unless stated otherwise.

| Target            | siRNA sequence                                                                                      | Notes                                                                                                                   |
|-------------------|-----------------------------------------------------------------------------------------------------|-------------------------------------------------------------------------------------------------------------------------|
| <b>Bcl-2</b>      | GGGAGAACAGGGUACGAUA<br>GAAGUACAUCUUAUAAG<br>GGAGGAUUGUGCCUUCUU<br>UCGCCGAGAUGUCCAGCCA               |                                                                                                                         |
| <b>Bcl-xL</b>     | GGACAGCAUAUCAGAGCUU<br>GAAAUGACCAGACACUGAC<br>CCUACAAGCUUCCAGAA<br>UUAGUGAUGUGGAAGAGAA              |                                                                                                                         |
| <b>Bid</b>        | GGGAUGGACUGAACGGACA<br>CUAGAGACAUGGAGAAGGA<br>GCACCUACGUGAGGAGCUU<br>GUAACUAACUGCAUACACU            |                                                                                                                         |
| <b>Bim</b>        | UGACCGAGAAGGUAGACAA<br>CAACCACUAUCUCAGUGCA                                                          | Life Technologies                                                                                                       |
| <b>BubR1</b>      | AACGGGCAUUUGAAUAUGAAA                                                                               | Positive control siRNA in library screen.<br>(Ditchfield et al., 2003)                                                  |
| <b>Egr1</b>       | GAUGAACGCAAGAGGCAUA<br>CGACAGCAGUCCCAUUUAC<br>GGACAUGACAGCAACCUUU<br>GACCUGAAGGCCCUCAAUA            |                                                                                                                         |
| <b>Myc</b>        | #4 CGAUGUUGUUUCUGUGGAA<br>#5 AACGUUAGCUUCACCAACA<br>#6 GGAACUAUGACCUCGACUA<br>#8 CUACCAGGCUGCGCGCAA | These four siRNAs were pooled for routine use while #4 was used in isolation for the RNAi-rescue experiment (Fig. S2B). |
| <b>G1</b>         | siGLO RISC-free siRNA<br>(D-001600-01-05)                                                           | Additional negative control siRNA (Fig. S2A).                                                                           |
| <b>GAPDH (GA)</b> | UGGUUUACAUGUCCAAUA                                                                                  | Negative control siRNA in library screen.                                                                               |
| <b>Hrk</b>        | GGGAAGCCCUUUGGAAAU<br>GAUCGUAGAAACACAGAAU<br>UCAAGGCGCUAGGCGACGA<br>AGGCGGAACUUGUAGGAAC             |                                                                                                                         |
| <b>ICAD</b>       | GGCGAGAUCGGACUCUAA<br>GACAUUCUGGCCAUUGAUA<br>ACGCAGAGCUUGCAUUCUC<br>GAAAGAAGAUCUGUCCAGC             |                                                                                                                         |

|                           |    |                                                                                                                 |                                                                        |
|---------------------------|----|-----------------------------------------------------------------------------------------------------------------|------------------------------------------------------------------------|
| <b>KCNK1</b>              | #6 | CGGUGGAGCUGCCCUAUGA                                                                                             | Active siRNA (Fig. S1)                                                 |
| <b>Mcl1</b>               |    | CGAAGGAAGUAUCGAAUUU<br>GAUUAUCUCUCGGUACCUU<br>GAAGGUGGCAUCAGGAAUG<br>GGUUUGGCAUAUCUAAUAA<br>UGGUUUACAUGUCGACUAA |                                                                        |
| <b>Non-targeting (NT)</b> |    | UGGUUUACAUGUUGUGUGA<br>UGGUUUACAUGUUUUCUGA<br>UGGUUUACAUGUUUCCUA                                                | Routine negative control siRNA pool.                                   |
| <b>Noxa</b>               |    | AAACUGAACUCCGGCAGA<br>GAACCUGACUGCAUAAAA<br>AAUCUGAUAUCCAAACUCU<br>GCAAGAACGCUCAACCGAG                          |                                                                        |
| <b>Scramble (SC)</b>      |    | AAAACCAUCAUACCAGAGACA                                                                                           | Additional negative control siRNA (Fig. S2A).                          |
| <b>SNTA1</b>              | #4 | CAGAUUGGCUGGCUAACUG                                                                                             | Active siRNA (Fig. S1D)                                                |
| <b>Tao1 (T1)</b>          |    | GUAUAUGGUCCUUUCUAA                                                                                              | Additional negative control siRNA (Fig. S2A). (Westhorpe et al., 2010) |
| <b>XIAP</b>               |    | GUAGAUAGAUGGCAAUAUG<br>GAACUGGGCAGGUUGUAGA<br>GAAAGAGAUUAGUACUGAA<br>GGACUCUACUACACAGGUA                        |                                                                        |
| <b>ZNF791</b>             | #1 | GGGAAGACCCGAAUGUUGA                                                                                             | Active siRNA (Fig. S1D)                                                |

### cDNAs

Open reading frames were generated either by using SuperScript One-Step RT-PCR with mRNA prepared from HeLa or RKO cells, or PCR amplified using Pfu Turbo with a plasmid as the template, then cloned into a pcDNA5/FRT/TO-based vector modified to include an N-terminal Myc or GFP epitope tag (Girdler et al., 2006). Myc and Omomyc were engineered with a C-terminal GFP tag, XIAP, Bcl-xL, ICAD and TRF2 were tagged with a Myc epitope at the N-terminus, and Bim was untagged. All ORFs were verified by sequencing.

| Name          | Accession   | PCR primers (5' - 3')                                                                                                                                                                               | Source                                    |
|---------------|-------------|-----------------------------------------------------------------------------------------------------------------------------------------------------------------------------------------------------|-------------------------------------------|
| <b>Bcl-xL</b> | NM_138578.1 | TCTCAGAGCAACCGGGAGCTG<br>TCATTTCCGACTGAAGAGTGAG                                                                                                                                                     | RT-PCR                                    |
| <b>Bim</b>    | NM_138621.4 | ATGGCAAAGCAACCTTCTG<br>TCAATGCATTCTCCACACC                                                                                                                                                          | Thermo Scientific<br>Clone ID 5213713     |
| <b>Myc</b>    | NM_002467.4 | ATGCCCTCAACGTTAGCTTC<br>CGCACAAGAGTTCCGTAG                                                                                                                                                          | RT-PCR                                    |
| <b>ICAD</b>   | NM_004401.2 | GAGGTGACCGGGACGCCGGG<br>CTATGTGGGATCCTGTCTGGC                                                                                                                                                       | RT-PCR                                    |
| <b>TRF2</b>   | NM_005652   | GCGGGAGGAGGCCGGGAGTAGC<br>TCAGTTCATGCCAAGTC                                                                                                                                                         | Addgene 16066<br>(Karlseder et al., 2002) |
| <b>XIAP</b>   | NM_001167.3 | ACTTTTAACAGTTTTGAAGG<br>TTAAGACATAAAAATTTTTGCTTG                                                                                                                                                    | RT-PCR                                    |
| <b>Omomyc</b> |             | ATGGAGGAGAATGTCAAG<br>CGCACAAGAGTTCCGTAG<br>GTTGCGGAAACAAAACGAACAGTTGA<br>TCAACTGTTTCGTTTTGTTCCGCAAC<br>CAAGCAGAGACGAAAAGCTCATTCTGA<br>-AATCGACTTGTTG<br>CAACAAGTCGATTTTCAGAAATGAGCTTTT-<br>GCGTCTC | (Soucek et al., 1998)                     |

## Antibodies

Primary antibodies for immunoblotting are listed below.

| Antigen                          | Antibody name                    | Source/ Citation                |
|----------------------------------|----------------------------------|---------------------------------|
| Bcl-xL                           | Rabbit anti-Bcl-xL               | Cell Signaling Technology       |
| Bcl2                             | Mouse anti-Bcl2                  | BD Biosciences                  |
| Bid                              | Rabbit anti-Bid (Human specific) | Cell Signaling                  |
| Bim                              | Rabbit anti-Bim                  | BD Biosciences                  |
| Bub3                             | Sheep anti-Bub3                  | Holland and Taylor, unpublished |
| BubR1                            | Sheep anti-BubR1 (SBR1.1)        | (Taylor et al., 2001)           |
| Caspase 3                        | Mouse anti-caspase 3             | Cell Signaling                  |
| Egr1                             | Rabbit anti-Egr1 (588)           | Santa Cruz                      |
| $\gamma$ H2AX                    | Rabbit anti- $\gamma$ H2Ax       | Novus Biologicals               |
| pH3-Ser10                        | Rabbit anti-Histone H3 pSerine10 | Millipore                       |
| Myc                              | Rabbit anti-c-Myc (Y69)          | AbCam                           |
| CAD                              | Rabbit anti-DFFB                 | Sigma                           |
| HRP anti-sheep/<br>mouse/ rabbit | Conjugated secondaries           | Invitrogen                      |
| ICAD                             | Rabbit anti-ICAD                 | AbCam                           |
| Mcl1                             | Rabbit anti-Mcl1 (S-19)          | Santa Cruz Biotechnology        |
| Myc epitope tag                  | 4A6                              | Millipore                       |
| Noxa                             | Mouse anti-Noxa (114C307)        | Merck Millipore                 |
| Tao1                             | Sheep anti-Tao1                  | (Westhorpe et al., 2010)        |
| XIAP                             | Rabbit anti-XIAP                 | Cell Signaling Technology       |

## Small molecule inhibitors

Small molecule inhibitors were dissolved in DMSO and stored at -20°C, except tetracycline which was dissolved in water.

| Name         | 1° Target     | Concentration | Source/ Citation                                      |
|--------------|---------------|---------------|-------------------------------------------------------|
| AZ138        | Eg5/KSP       | 1 $\mu$ M     | AstraZeneca (Gascoigne and Taylor, 2008)              |
| AZ3146       | Mps1          | 2 $\mu$ M     | AstraZeneca (Hewitt et al., 2010)                     |
| BI2536       | Plk1          | 100 nM        | Boehringer Ingelheim (Steehmaier et al., 2007)        |
| GSK923295    | Cenp-E        | 100 nM        | (Wood et al., 2010), (Bennett et al., in preparation) |
| JQ1          | Brd4          | 0.5 $\mu$ M   | Stefan Knapp (Filippakopoulos et al., 2010)           |
| MLN8054      | Aurora A      | 1 $\mu$ M     | Millennium Pharmaceuticals (Manfredi et al., 2007)    |
| Nocodazole   | Microtubules  | 30 ng/ml      | Sigma                                                 |
| Taxol        | Microtubules  | 100 nM        | Sigma                                                 |
| Tetracycline | Tet repressor | See legends   | Sigma                                                 |
| WEHI-539     | Bcl-xL        | 100 nM        | Apexbio (Lessene et al., 2013)                        |
| ZM447439     | Aurora B      | 2 $\mu$ M     | Tocris (Ditchfield et al., 2003)                      |

## Supplemental References

- Bunz, F., Dutriaux, A., Lengauer, C., Waldman, T., Zhou, S., Brown, J. P., Sedivy, J. M., Kinzler, K. W., and Vogelstein, B. (1998). Requirement for p53 and p21 to sustain G2 arrest after DNA damage. *Science* *282*, 1497-1501.
- Chung, N., Zhang, X. D., Kreamer, A., Locco, L., Kuan, P. F., Bartz, S., Linsley, P. S., Ferrer, M., and Strulovici, B. (2008). Median absolute deviation to improve hit selection for genome-scale RNAi screens. *J Biomol Screen* *13*, 149-158.
- Ditchfield, C., Johnson, V., Tighe, A., Ellston, R., Haworth, C., Johnson, T., Mortlock, A., Keen, N., and Taylor, S. S. (2003). Aurora B couples chromosome alignment with anaphase by targeting BubR1, Mad2, and Cenp-E to kinetochores. *J Cell Biol* *161*, 267-280.
- Girdler, F., Gascoigne, K. E., Eyers, P. A., Hartmuth, S., Crafter, C., Foote, K. M., Keen, N. J., and Taylor, S. S. (2006). Validating Aurora B as an anti-cancer drug target. *J Cell Sci* *119*, 3664-3675.
- Hewitt, L., Tighe, A., Santaguida, S., White, A. M., Jones, C. D., Musacchio, A., Green, S., and Taylor, S. S. (2010). Sustained Mps1 activity is required in mitosis to recruit O-Mad2 to the Mad1-C-Mad2 core complex. *J Cell Biol* *190*, 25-34.
- Huang da, W., Sherman, B. T., and Lempicki, R. A. (2009). Systematic and integrative analysis of large gene lists using DAVID bioinformatics resources. *Nat Protoc* *4*, 44-57.
- Karlseder, J., Smogorzewska, A., and de Lange, T. (2002). Senescence induced by altered telomere state, not telomere loss. *Science* *295*, 2446-2449.
- Laoukili, J., Kooistra, M. R., Bras, A., Kauw, J., Kerkhoven, R. M., Morrison, A., Clevers, H., and Medema, R. H. (2005). FoxM1 is required for execution of the mitotic programme and chromosome stability. *Nat Cell Biol* *7*, 126-136.
- Manfredi, M. G., Ecsedy, J. A., Meetze, K. A., Balani, S. K., Burenkova, O., Chen, W., Galvin, K. M., Hoar, K. M., Huck, J. J., LeRoy, P. J., *et al.* (2007). Antitumor activity of MLN8054, an orally active small-molecule inhibitor of Aurora A kinase. *Proc Natl Acad Sci U S A* *104*, 4106-4111.
- Soucek, L., Helmer-Citterich, M., Sacco, A., Jucker, R., Cesareni, G., and Nasi, S. (1998). Design and properties of a Myc derivative that efficiently homodimerizes. *Oncogene* *17*, 2463-2472.
- Steegmaier, M., Hoffmann, M., Baum, A., Lenart, P., Petronczki, M., Krssak, M., Gurtler, U., Garin-Chesa, P., Lieb, S., Quant, J., *et al.* (2007). BI 2536, a potent and selective inhibitor of polo-like kinase 1, inhibits tumor growth in vivo. *Curr Biol* *17*, 316-322.
- Supek, F., Bosnjak, M., Skunca, N., and Smuc, T. (2011). REVIGO summarizes and visualizes long lists of gene ontology terms. *PLoS ONE* *6*, e21800.
- Taylor, S. S., Hussein, D., Wang, Y., Elderkin, S., and Morrow, C. J. (2001). Kinetochores localisation and phosphorylation of the mitotic checkpoint components Bub1 and BubR1 are differentially regulated by spindle events in human cells. *J Cell Sci* *114*, 4385-4395.
- Westhorpe, F. G., Diez, M. A., Gurden, M. D., Tighe, A., and Taylor, S. S. (2010). Re-evaluating the role of Tao1 in the spindle checkpoint. *Chromosoma* *119*, 371-379.
- Wood, K. W., Lad, L., Luo, L., Qian, X., Knight, S. D., Nevins, N., Brejc, K., Sutton, D., Gilmartin, A. G., Chua, P. R., *et al.* (2010). Antitumor activity of an allosteric inhibitor of centromere-associated protein-E. *Proc Natl Acad Sci U S A* *107*, 5839-5844.
- Yang, W., Soares, J., Greninger, P., Edelman, E. J., Lightfoot, H., Forbes, S., Bindal, N., Beare, D., Smith, J. A., Thompson, I. R., *et al.* (2013). Genomics of Drug Sensitivity in Cancer (GDSC): a resource for therapeutic biomarker discovery in cancer cells. *Nucleic Acids Res* *41*, D955-961.
